1 **Feasibility of constructing multi-dimensional genomic maps of juvenile idiopathic**  
2 **arthritis**

3 Lisha Zhu<sup>1,\*</sup>, Kaiyu Jiang<sup>2,\*</sup>, Laiping Wong,<sup>2\*</sup> Michael J. Buck<sup>1,3</sup>, Yanmin Chen<sup>2</sup>, Halima  
4 Moncrieffe,<sup>4,5</sup> Laura A. McIntosh,<sup>4</sup> Kathleen M. O'Neil,<sup>6</sup> Tao Liu<sup>1,3#</sup>, Xiaoyun Xing,<sup>7</sup>  
5 Daofeng Li,<sup>7</sup> Ting Wang,<sup>7</sup> and James N. Jarvis <sup>2,3,#</sup>

6 <sup>1</sup> Department of Biochemistry, University at Buffalo, Center for Excellence in  
7 Bioinformatics and Life Sciences, 701 Ellicott St, Buffalo, NY 14203

8 <sup>2</sup>Department of Pediatrics, Pediatric Rheumatology Research, Clinical & Translational  
9 Research Ctr, 875 Ellicott St., University at Buffalo, Buffalo, NY 14203

10 <sup>3</sup> Graduate Program in Genetics, Genomics, & Bioinformatics, University at Buffalo,  
11 Center for Excellence in Bioinformatics and Life Sciences, 701 Ellicott St, Buffalo, NY  
12 14203

13 <sup>4</sup> Center for Autoimmune Genomics & Etiology, Cincinnati Children's Medical Center,  
14 3333 Burnet Ave, Cincinnati, OH 45229

15 <sup>5</sup> Department of Pediatrics, University of Cincinnati, College of Medicine, Cincinnati, OH  
16 45229.

17 <sup>6</sup> Department of Pediatrics, Division of Pediatric Rheumatology, 699 Riley Hospital Dr,  
18 Indianapolis, IN, 46202

19 <sup>7</sup> Department of Genetics, Center for Genome Sciences and Systems Biology,  
20 Washington University School of Medicine, 4515 McKinley Ave, St. Louis, MO 63108

21 \* These authors contributed equally to this work.

22 # Corresponding author: jamesjar@buffalo.edu or tliu4@buffalo.edu

23 Email addresses:

24 Lisha Zhu: lishazhu4508@gmail.com

25 Kaiyu Jiang: kaiyujia@buffalo.edu

26 Laiping Wong: LaiPing.Wong@RoswellPark.org

27 Michael J. Buck: [mjbuck@buffalo.edu](mailto:mjbuck@buffalo.edu)  
28 Yanmin Chen: [yanminch@buffalo.edu](mailto:yanminch@buffalo.edu)  
29 Halima Moncrieffe: [Halima.moncrieffe@cchmc.org](mailto:Halima.moncrieffe@cchmc.org)  
30 Laura McIntosh: [laura.brungs@cchmc.org](mailto:laura.brungs@cchmc.org)  
31 Kathleen M. O'Neil: [kmoneil@iu.edu](mailto:kmoneil@iu.edu)  
32 Xiaoyun Xing: [xxing@genetics.wustl.edu](mailto:xxing@genetics.wustl.edu)  
33 Daofeng Li: [dli@genetics.wustl.edu](mailto:dli@genetics.wustl.edu)  
34 Ting Wang: [twang@genetics.wustl.edu](mailto:twang@genetics.wustl.edu)  
35 James N. Jarvis: [jamesjar@buffalo.edu](mailto:jamesjar@buffalo.edu)

36

37

38

39

40

41

42

43

44

45

46

47

48

49

50

51

52

53 **Abstract**

54 **Background** – Juvenile idiopathic arthritis (JIA) is one of the most common chronic  
55 conditions of childhood. Like many common chronic human illnesses, JIA likely involves  
56 complex interactions between genes and the environment, mediated by the epigenome.  
57 Such interactions are best understood through multi-dimensional genomic maps that  
58 identify critical genetic and epigenetic components of the disease. However,  
59 constructing such maps in a cost-effective way is challenging, and this challenge is  
60 further complicated by the challenge of obtaining biospecimens from pediatric patients at  
61 time of disease diagnosis, prior to therapy, as well as the limited quantity of biospecimen  
62 that can be obtained from children, particularly those who are unwell. In this paper, we  
63 demonstrate the feasibility and utility of creating multi-dimensional genomic maps for JIA  
64 from limited sample numbers.

65 **Methods** – To accomplish our aims, we used an approach similar to that used in the  
66 ENCODE and Roadmap Epigenomics projects, which used only 2 replicates for each  
67 component of the genomic maps. We used genome-wide DNA methylation sequencing,  
68 whole genome sequencing on the Illumina 10x platform, RNA sequencing, and  
69 chromatin immunoprecipitation-sequencing for informative histone marks (H3K4me1 and  
70 H3K27ac) to construct a multi-dimensional map of JIA neutrophils, a cell we have shown  
71 to be important in the pathobiology of JIA .

72 **Results** - The epigenomes of JIA neutrophils display numerous differences from those  
73 from healthy children. DNA methylation changes, however, had only a weak effect on  
74 differential gene expression. In contrast, H3K4me1 and H3K27ac, commonly associated  
75 with enhancer functions, strongly correlated with gene expression. Furthermore,  
76 although unique/novel enhancer marks were associated with insertion-deletion events  
77 (indels) identified on whole genome sequencing, we saw no strong association between  
78 epigenetic changes and underlying genetic variation. The initiation of treatment in JIA is

79 associated with a re-ordering of both DNA methylation and histone modifications,

80 demonstrating the plasticity of the epigenome in this setting.

81 **Conclusions** These findings, generated from a small number of patient samples,

82 demonstrate how multidimensional genomic studies may yield new understandings of

83 biology of JIA and provide insight into how therapy alters gene expression patterns.

84

85

86

87

88

89

90

91

92

93

94

95

96

97

98

99

100

101

102

103

104

## 105 **Introduction**

106 Gene-environment interactions are thought to mediate many complex human traits,  
107 including human diseases [1], [2]. It is becoming increasingly clear that the influences of  
108 environment (broadly considered) are mediated through epigenetic changes to DNA and  
109 DNA-associated histones [3], [4], [5]. Thus, the field of epigenetics is emerging as an  
110 important complement to genetics for our understanding of complex traits [6], including  
111 rheumatic diseases such as rheumatoid arthritis [7] and systemic lupus erythematosus  
112 [8]. Juvenile idiopathic arthritis (JIA) is among those diseases that has been identified as  
113 a complex trait emerging from gene-environment interactions [9]. While substantial  
114 progress has been made in identifying genetic risk for JIA [10], our understanding of  
115 underlying epigenetic changes, and how/whether such changes contribute to disease  
116 risk or therapeutic response remains unknown. Furthermore, little is known, in the  
117 context of human diseases, about interactions between underlying genetic  
118 polymorphisms and the epigenome.

119 Our group has proposed that, rather than being understood primarily as an  
120 autoimmune disease, initiated by the faulty recognition of self-peptides by the adaptive  
121 immune system, JIA emerges because of complex interactions between innate and  
122 adaptive immunity [11]. We have demonstrated aberrant patterns of neutrophil activation  
123 that are linked to fundamental metabolic and oscillatory properties in JIA neutrophils [12]  
124 and reported aberrant patterns of gene expression associated with the metabolic  
125 abnormalities. [13],[14],[15] The aberrant patterns of gene expression do not return to  
126 normal when children are successfully treated [16]. Furthermore, contingency analyses  
127 of JIA neutrophil expression data [11] suggest a fundamental breakdown in those  
128 mechanisms that coordinate gene expression on a genome-wide basis [17].

129

130 In order to understand the interaction between the epigenome and underlying genetic  
131 variance, the field is going to require multi-dimensional genomic maps that query  
132 epigenetically-marked transcriptional regulators (e.g., H3K4me1/H3K27ac-marked  
133 enhancers), chromatin organizers (e.g., H3K9me3, CTCF binding sites), and other  
134 epigenetic modifiers of chromatin structure/accessibility (e.g., DNA methylation), and link  
135 those observations to observed aberrations in transcription. However, obtaining a  
136 sufficiently large volume of blood to perform such studies using single samples acquired  
137 from individual children is neither safe nor practical, and the expense of acquiring,  
138 processing, and analyzing a large group of samples adds another impediment.

139 We have therefore explored whether the necessary “genomic maps” might be  
140 generated using an approach similar to that used in the ENCODE and Roadmap  
141 Epigenomics projects: performing different analyses on small groups of cross-sectional  
142 samples and overlaying the data to provide a broad outline of functionally/ pathologically  
143 relevant regions. Such maps might then serve as a reference that allows other  
144 investigators to focus on specific genomic regions or chromatin features, which are not  
145 annotated in either ENCODE or Roadmap Epigenomics data sets, since those data sets  
146 carry no information about cells from human diseases or even healthy children. It should  
147 be noted that the Roadmap Epigenomics data sets, which have provided physician-  
148 scientists and geneticists a treasure trove of information that has been used to  
149 understand human disease, were generated using only two replicates [18]. We  
150 therefore set out to determine whether useful information might be derived from small  
151 numbers of replicates if multiple genomic modalities for pathologically relevant cells in  
152 JIA were overlaid in a manner similar to the Roadmap Epigenomics data.

153 To accomplish these aims, we started with neutrophils, a cell type that can be safely  
154 obtained in relative abundance from children and with which we have considerable

155 experience. We performed genome-wide epigenome analyses using cross-sectional  
156 samples to build ENCODE-like epigenetic maps. We then queried whether such maps  
157 could be used to address relevant scientific and clinical questions, such as: (1) whether  
158 epigenetic risk for the disease is reflected in JIA neutrophils; (2) whether epigenetic  
159 alterations reflect underlying disease-associated genetic variance; and (3) whether  
160 epigenetic alterations are a permanent feature of JIA neutrophils; specifically, we asked  
161 whether treatment for JIA alters the neutrophil epigenome.

162

## 163 **Material and Methods**

164 **Patients and patient samples for multi-dimensional analysis.** Neutrophils were  
165 extracted from all patients with the polyarticular, rheumatoid factor negative form of JIA  
166 as determined by internationally-accepted criteria [19]. (hereafter referred to as patients  
167 with JIA) and pediatric healthy controls.

168 **Whole genome methylation cohort:** This group consisted of 9 patients with JIA and  
169 five healthy control children (HC). Patients with JIA were grouped by disease state and  
170 initiation of methotrexate, the standard therapy for JIA. Specifically, we studied 6  
171 patients with active, untreated disease (referred to as ADU) and 3 patients with active  
172 disease who had been started on methotrexate (,these patients are referred to as ADT).  
173 Disease activity was assessed using standardized criteria developed by Wallace and  
174 colleagues [20]. In addition, we performed whole genome methylation analysis on 5  
175 healthy children (HC).

176 **ChIP-seq cohort:** Five children with JIA were studied: two children had untreated,  
177 newly-diagnosed JIA and 3 children were on therapy with methotrexate, studied 6 to 8  
178 weeks after the initiation of therapy. We also studied 3 healthy controls.

179 **RNA-seq cohort:** Six children with JIA were studied and two healthy controls. Of the  
180 patients with JIA three children had untreated, newly-diagnosed JIA and three children  
181 had active JIA on therapy with methotrexate.

182

183 All patients with JIA were recruited from the pediatric rheumatology clinics at the  
184 University of Oklahoma, Cincinnati Children's Medical Center, and the Women and  
185 Children's Hospital of Buffalo. The healthy control (HC) children were recruited from the  
186 University of Oklahoma and Women and Children's Hospital of Buffalo general  
187 pediatrics clinics. All protocols for sample collection were reviewed and approved by the  
188 University of Oklahoma, University at Buffalo, and Cincinnati Children's Hospital  
189 Institutional Review Boards. All research was carried out in compliance with the  
190 approved protocol. Informed consent documents were signed by the parents of all  
191 subjects, which also included consent to published de-identified information. Where  
192 appropriate, assent documents were signed by children over the age of 7 years in  
193 accordance with Cincinnati Children's and University of Oklahoma IRB requirements.

194

195 **Cell isolation.** Neutrophils were separated by density-gradient centrifugation as  
196 described previously [12]. In brief, whole blood was drawn into 10 mL CPT tubes (Becton  
197 Dickinson, Franklin Lakes, NJ), which is an evacuated blood collection tube system  
198 containing sodium citrate anticoagulant and blood separation media composed of a  
199 thixotropic polyester gel and a FICOLL™ Hypaque™ solution. Cell separation  
200 procedures were started within 1 h from the time the specimens were drawn. Neutrophils  
201 were separated by density-gradient centrifugation at 1,700× g for 20 min. After removing  
202 red cells from neutrophils by hypotonic lysis, neutrophils were then immediately treated  
203 differently depends on the downstream work. Cells prepared in this fashion are more  
204 than 98 % CD66b + by flow cytometry and contain no contaminating CD14+ cells, as



205 previously reported [12]. Thus, although these cell preparations contained small  
206 numbers of other granulocytes, they will be referred to here as “neutrophils” for brevity  
207 and convenience. For RNA-seq, neutrophils were placed in TRIzol® reagent (Invitrogen,  
208 Carlsbad, CA) and stored at -80 °C until used for RNA isolation. For DNA methylation  
209 sequencing study, neutrophil pellets were stored at -80 °C until used. For ChIP-seq  
210 study, neutrophils were immediately treated using 1% formaldehyde following the  
211 protocol (see description below) and then stored at -80 °C until used.

212

213 **MeDIP-seq and MRE-seq library generation, sequencing and mapping.** MeDIP and  
214 MRE sequencing libraries were generated as described previously [PMC4300244] with  
215 minor modifications. Briefly, for MeDIP-seq, 500 ng of DNA isolated was sonicated, end-  
216 processed, and ligated to paired-end adapters. After agarose gel size-selection, DNA  
217 was immunoprecipitated using a mouse monoclonal anti-methylcytidine antibody.  
218 Immunoprecipitated DNA was washed, amplified by 12 cycles of PCR, and size-selected  
219 by agarose gel electrophoresis. For MRE-seq, 5 parallel digests (HpaII, Hin6I, SsiI,  
220 BstUI, and HpyCH4IV; New England Biolabs) were performed, each with 200 ng of DNA.  
221 Digested DNA was combined, size-selected, end-processed, and ligated to single-end  
222 adapters. After the second size-selection, DNA was amplified by 15 cycles of PCR and  
223 size-selected by agarose gel electrophoresis.

224 MeDIP and MRE libraries were sequenced on Illumina HiSeq machine with a total  
225 number of approximately 1.28 billion MeDIP-seq reads and 583 million MRE-seq reads.

226

227 **RNA Isolation and Sequencing.** Total RNA was extracted using Trizol® reagent  
228 according to manufacturer's directions. RNA was further purified using RNeasy MiniElute  
229 Cleanup kit including a DNase digest according to the manufacturer's instructions  
230 (QIAGEN, Valencia, CA). RNA was quantified spectrophotometrically (Nanodrop,

231 Thermo Scientific, Wilmington, DE) and assessed for quality by capillary gel  
232 electrophoresis (Agilent 2100 Bioanalyzer; Agilent Technologies, Inc., Palo Alto, CA).  
233 Single-end cDNA libraries were prepared for each sample and sequenced using the  
234 Illumina TruSeq RNA Sample Preparation Kit by following the manufacture's  
235 recommended procedures. And then sequenced using the Illumina HiSeq 2000. Library  
236 construction and RNA sequencing were performed in the Next generation sequencing  
237 center in University at Buffalo.

238

239 **Pre-processing and differential gene expression analysis of RNA-Seq data.** The  
240 raw reads obtained from paired-end RNA-Seq were mapped to human genome hg19,  
241 downloaded from the University of California Santa Cruz Genome Bioinformatics Site  
242 (<http://genome.ucsc.edu>) with no more than 2 mismatches using tophat v2.0.10 [21].  
243 Gene expression level was calculated as FPKM (Fragments Per Kb per Million reads)  
244 with Cufflinks v2.1.1 [22], the annotation gtf file provided for genes is gencode v19  
245 annotation gtf file from GENCODE (<http://www.gencodegenes.org>) [23]. We used Cuffdiff  
246 v2.2.1 [24] for pairwise comparisons of ADU, ADT and HC to identify differentially  
247 expressed genes (DEGs), with a false discovery rate of 5%. Genes with average FPKM  
248  $\geq 1$  in at least one of the three groups were considered as expressed genes in  
249 neutrophils.

250

251 **Chromatin immunoprecipitation for histone marks H3K4me1 and H3K27ac and**  
252 **sequencing.** Neutrophils were isolated as described previously [16]. The ChIP assay  
253 was carried out according to the protocol of manufacturer (Cell Signaling Technologies  
254 Inc., Danvers, MA, USA). Briefly, adult neutrophils were incubated with newly prepared  
255 1% formaldehyde in 10 ml PBS for 10 min at room temperature (RT). Crosslinking was  
256 quenched by adding 1× glycine and incubation for 5 min at RT. The crosslinked samples

257 were centrifuged at 800 x g for 5 min. The supernatant was discarded, and the pellet  
258 was washed two times with cold PBS followed by resuspension in 10 ml ice-cold Buffer  
259 A plus DTT, PMSF and protease inhibitor cocktail. Cells were incubated on ice for 10  
260 minutes and centrifuged at 800 x g for 5 min at 4°C to precipitate nuclei pellets, which  
261 were then resuspended in 10 ml ice-cold Buffer A plus DTT. The nuclei pellet was  
262 incubated with Micrococcal nuclease for 20 minutes at 37°C with frequent mixing to  
263 digest DNA to lengths of 150 – 900bp. Sonication of nuclear lysates was performed  
264 using Sonic Dismembrator (FB-705, Fisher Scientific, Pittsburgh, PA, USA) on ice under  
265 the following conditions: power of 5, sonication time of 30 seconds with pulse on 10 s  
266 and pulse off 30 s. After centrifugation of sonicated lysates at 10000 x g at 4°C for 10  
267 min, the supernatant was transferred into a fresh tube. Fifty microliters of the  
268 supernatant (chromatin preparation) was taken to analyze chromatin digestion and  
269 concentration. Fifteen micrograms of chromatin was added into 1 x ChIP buffer plus  
270 protease inhibitor cocktail in a total volume of 500 µl. After removal 2% of chromatin as  
271 input sample, the antibodies were added in the ChIP buffer. The antibodies against  
272 respective histone modifications are: rabbit polyclonal antibodies against histone H3  
273 acetylated at lysine 27 (H3K27ac) and histone H3 monomethylated at lysine 4  
274 (H3K4me1) from Cell Signaling Technologies (Danvers, MA, USA). The negative control  
275 is normal IgG (Cell Signaling Technologies. Danvers, MA, USA). After  
276 immunoprecipitation (IP) overnight at 4°C, the magnetic beads were added and  
277 incubated another 2 hours at 4°C. The magnetic beads were collected with magnetic  
278 separator (Life Technologies, Grand Island, NY, USA). The beads were washed  
279 sequentially with low and high salt wash buffer, followed by incubation with elution buffer  
280 containing proteinase K and NaCl to elute protein/DNA complexes and reverse  
281 crosslinks of protein/DNA complexes to release DNA. The DNA fragments were purified  
282 by spin columns and dissolved in the elution buffer of a total volume of 50 µl. The

283 crosslinks of input sample were also reversed in elution buffer containing proteinase K  
284 before purification with spin columns. Then DNA-sequencing was conducted using the  
285 Illumina HiSeq 2500 at the next generation sequencing center in University at Buffalo.

286

287 **ChIP-Seq analysis of neutrophils.** Sequencing reads from ChIP-Seq experiments  
288 were mapped to human genome hg19 using BWA (Burrows-Wheeler Aligner, version  
289 0.7.7-r441) [25]. MACS2 v2.1.10 [26] was applied for calling regions enriched with  
290 histone marks against the input sample, with the parameters “--nomodel --extsize 150 --  
291 broad --broad-cutoff 0.1”.

292

293 **Genomic features.** The broad regions of H3K4me1 and H3K27ac were annotated using  
294 CEAS software [27]. The annotation of a given region is decided by asking which of the  
295 following genomic features in order can be first overlapped: the 3 kbps upstream of  
296 known transcription start site as “promoter”, the 3kbps downstream of transcription  
297 termination site as “downstream”, “3’ UTR”, “intron”, “5’ UTR”, “exon” or the “intergenic”  
298 regions.

299

300 **Identification of differentially enriched regions (DERs).** To identify differentially  
301 enriched regions, H3K27ac and H3K4me1 ChIP-Seq data were grouped according to  
302 disease conditions: ADT (n=3), ADU (n=2) and HC (n=3). The peak regions obtained  
303 from MACS2 v2.1.10 [26] in each individual of three groups were combined together,  
304 sequence coverage of each individual was calculated using MACS2 v2.1.10 [26] pileup  
305 by extending each read to length of 150 bp and the resulting coverage profiles were  
306 exported as bigwig files. The peak regions were binned to 200-bp windows with a sliding  
307 window of 100 bp, the enrichment values which expressed as reads per kilobase per  
308 million mapped (RPKM) were calculated for each 200-bp windows by using bigwig files.

309 edgeR [28] was then applied to discover initial DERs between ADU and HC, the P-value  
310 and fold-change (FC) threshold were decided according to volcano plot. (FDR < 0.001  
311 for H3K27ac and FDR < 0.05 for H3K4me1 in ADU vs. HC; FC cutoff was set to 2). The  
312 DERs exhibited distinct variability between ADU and HC for both H3K27ac and  
313 H3K4me1, demonstrating distinct clusters that allowed accurately classification of each  
314 sample (**Figure 1a**). MACS2 bdgbroadcall [26] was applied to obtain the broad DERs  
315 which were used in further analysis from the initial DERs. The lower cutoff of FDR was  
316 set to 0.05 for H3K27ac and 0.1 for H3K4me1, the lower cutoff of FC was set to 1.5. The  
317 initial DERs between ADU and ADT were obtained using a P value < 0.005 and FC > 2  
318 for both H3K27ac and H3K4me1. To call broad DERs, the lower cutoff of P value was  
319 set to 0.05 and FC was set to 1.5. The intersection of broad DERs gained or lost in the  
320 ADU group in both ADU vs. HC and ADU vs. ADT were considered as regions  
321 significantly affected by treatment. To obtain the treatment-unique DERs, we treated  
322 ADU and HC together as one group and compared them with ADT. The initial DERs  
323 were obtained from edgeR [28] using P value < 0.001 and FC > 2. For broad DER  
324 calling, the lower cutoff for P value was 0.05 and 1.5 for FC. The broad DERs obtained  
325 by the method were then intersected with the regions considered as similar between  
326 ADU and HC ( $\log_2FC < 0.1$  as peak cutoff and  $\log_2FC < 0.2$  as linking peaks cutoff in  
327 MACS2 bdgbroadcall) to obtain ADT unique DERs. All the DERs used for further  
328 analysis should with length no less than 200bp.

329

330 **Identification of differentially methylated regions (DMRs).** The reads of MeDIP-Seq  
331 and MRE-Seq were aligned with bwa [25] to human hg19. Female and male samples  
332 were mapped with female and male bwa index separately. Regions related to X and Y  
333 chromosomes were removed to avoid sex bias. Pairwise statistical analyses of DMRs in  
334 ADU (n=6), ADT (n=3) and HC (n=5) groups were performed with repMnM, a modified

335 version of M&M [29]. The bin length was set to 500bp, and those regions with q values  
336 smaller than  $1 \times 10^{-2}$  were selected as significant DMRs.

337

338 **Whole Genome Sequencing (WGS).** We performed WGS on the Illumina X Ten  
339 platform on 50 samples from 48 individuals with JIA (duplicates were sequenced to  
340 assess quality and fidelity of the sequencing data). Of these, 37 subjects were girls and  
341 11 were boys. All patients were of European descent (n=33) or mixed European-  
342 American Indian descent (n=5). We have recently published a preliminary analysis of  
343 these data [30].

344 We used BWA [25] to map sequencing reads of each sample with respect to the human  
345 reference genome hg19. Potential artifacts caused by PCR duplicated reads were  
346 removed using Picard tools (<http://picard.sourceforge.net>). Genome Analysis Toolkit  
347 (GATK version 3.2-2-gec30cee)<sup>36</sup> was used to refine reads around small insertions or  
348 deletions (indels) and recalibrate base quality scores. We adopted the GATK best  
349 practices in calling SNPs, small insertion or deletion (indels) between 1 and 50 bp in  
350 size. The first step of SNP and indel discovery involved single sample variant calling  
351 (GATK HaplotypeCaller), followed by joint genotyping per cohort (GATK  
352 GenotypeGVCFs) and variant quality variant score recalibration (VQSR, GATK  
353 VariantRecalibrator). In order to discover high quality variants, we retained variants that  
354 passed variant filtration criteria consisting of minimum read depth of 20X, genotype  
355 quality  $\geq 20$ , variant quality  $\geq 30$  and minor-read ratio (MRR)  $\geq 0.2$ . MRR was accessed to  
356 ensure the read of the less covered allele (reference or alternate) over the total number  
357 of reads have sufficient depth to be called as a variant. The variant filtration criteria aim  
358 to minimize false positives in genetic variant discovery. We note that in the 48 WGS on  
359 JIA samples, we performed two batches of sequencing (29 samples in the first batch and  
360 19 samples in the second batch) to validate variant discovery. From the variant

361 concordance analysis performed on the 2 sequencing batches, we found a concordance  
362 rate >83% for SNPs and indels, indicating that the detected genetic variants are likely to  
363 be authentic and suitable for downstream analysis.

364

### 365 **Interrogating with whole genome sequencing DNA variants of 48 JIA individuals.**

366 In order to discover the possible regulation relationship between enhancers and genomic  
367 variation, we intersected the detected DER (DMR) with variants discovered from deep  
368 whole genome sequencing (WGS) of 48 JIA individuals using bedtools program[8]. Next,  
369 we adopted Fisher exact test for enrichment analysis to inform the statistical significance  
370 for the association between DER (DMR) and genetic variants relative to genetic variants  
371 of the 1000 Genomes Projects (1KGP). We used this approach as it would be  
372 impossibly expensive to conduct WGS on a healthy control cohort. Furthermore, the  
373 whole purpose of publicly available healthy genome sequences is to serve for a basis of  
374 comparisons in studies like this one. At the sample collection time, 2504 subjects from  
375 1KGP declared themselves to be healthy. We therefore tested the difference in  
376 proportion of SNPs overlapping DER (DMR) between JIA SNPs and 1KGP SNPs. First,  
377 we constructed 2 by 2 contingency tables, with the first row containing the number of  
378 overlapping SNPs (with DER or DMR) for JIA (first column) and 1KGP (second column),  
379 while the second row contained numbers of non-overlapping SNPs for JIA and 1KGP.  
380 Fisher exact test's p-value was computed to gauge the significance of the observed  
381 differences. The odds ratio of the Fisher exact test was used as enrichment fold. Using  
382 this approach, we tested whether there were more genetic variants derived from JIA  
383 genomes compared to genetic variants in the 1KGP data set when overlapped with  
384 epigenetic elements (DER or DMR). All analyses were conducted using in-house  
385 customized Perl and R scripting under Linux environment.

386



387 **Public Availability of Genomic Data.**

388 We have made the data available to the scientific community. WGS bam files have  
389 been uploaded to NCBI bioproject:

390 <https://www.ncbi.nlm.nih.gov/bioproject/?term=PRJNA343545> .

391 WGS snps/indels were uploaded to dbsnp149: handle id: JJLAB. WGS structural  
392 variants were submitted to DGVa id: estd231

393 <https://www.ncbi.nlm.nih.gov/dbvar/studies/estd231/> .

394 Other data were uploaded to the Gene Expression Omnibus (GEO). The GEO  
395 accession number for the RNA-Seq in neutrophils is GSE92293, for ChIP-Seq of  
396 H3K27ac and H3K4me1 in neutrophils is GSE92393, and for DNA methylation in  
397 neutrophils is GSE92749.

398

399 **Results**

400 As noted in our Introduction, our goal in this study was to test the feasibility of generating  
401 high-quality maps of the epigenomes of pathologically relevant cells in disease states,  
402 mirroring the Roadmap Epigenomics and ENCODE data. Such maps might then be  
403 used to guide focused studies on specific regions of interest, for example, in studies  
404 aimed to understand the relationship between genetic variation and chromatin structure,  
405 or studies aimed at understanding mechanisms underlying the transcriptional  
406 abnormalities observed in peripheral blood cells of children with JIA [15, 31].

407

408 **Differentially expressed genes from RNA-Seq analysis**

409 We first sought to corroborate our previous observations that JIA neutrophils show  
410 distinct transcriptional abnormalities compared to neutrophils in healthy children, and  
411 that treatment is associated with transcriptional reorganization [12, 14]. We identified 99  
412 DEGs (FDR < 0.05, Fold change < 1.5) between ADU (3 individuals) and HC groups (2



413 individuals), with 50 genes showing higher expression in ADU and 49 genes showing  
414 higher expression in HC. Using all genes expressed in neutrophils as background, gene  
415 ontology (GO) analyses by the GOrilla tool [32] predictably showed these DEGs were  
416 enriched for immune effector processes and defense responses. To investigate whether  
417 the initiation of therapy with methotrexate was associated with transcriptional changes in  
418 patients with JIA, we also compared the gene expression between untreated (ADU)  
419 patients and children who had started methotrexate therapy 2-6 weeks earlier but still  
420 had active disease (ADT; 3 individuals). We identified 703 DEGs that demonstrated  
421 significant expression changes between ADU and ADT, with 341 genes showing higher  
422 expression levels in ADU and 362 showing higher expression in ADT. This extensive  
423 alteration in neutrophil transcription after the initiation of therapy corroborates our  
424 findings from hybridization-based microarrays [33]. GO analysis showed that the highly  
425 expressed genes in ADU were associated with cellular protein modification processes  
426 and regulation of cellular biosynthetic processes, and those with higher expression in  
427 ADT were enriched in protein targeting to the endoplasmic reticulum and viral  
428 transcription and translation. Lists of DEGs and enriched GO terms for each group are  
429 provided in **S.Table1**. These findings are consistent with what we have previously  
430 observed in JIA neutrophils using hybridization-based-microarrays, (i.e., that JIA  
431 neutrophils show aberrant patterns of transcription and that therapy re-orders, but does  
432 not normalize, neutrophil transcriptomes). [12]

433 We next investigated how expression levels of the 99 specific DEGs identified in the  
434 ADU vs. HC comparison might be altered during treatment. We found that, among the  
435 99 DEGs identified in the ADU vs. HC comparison, 79 changed after initiation of  
436 treatment toward levels seen in HC, i.e., these genes have the same up or down fold-  
437 change trends in the ADU vs. ADT comparison (**Figure S1**). Thus, while the initiation of  
438 therapy begins to “correct” genes that show aberrant patterns of expression in untreated

439 JIA, the ADT state has its own distinct transcriptional signature that differs both HC and  
440 ADU. These findings corroborate what we have previously reported from hybridization-  
441 based microarray studies [13].

442 In addition to corroborating our previous findings, the RNA-Seq studies show  
443 that reference “maps” of disease-specific epigenomes will need to be generated for  
444 specific disease states (e.g., untreated disease, disease that is active, disease that is in  
445 remission, etc). These studies further highlight the desirability of creating these maps  
446 from small numbers of samples in order to reduce the expense of generating them.

447

#### 448 **Presence of disease-specific enhancers within JIA neutrophils**

449 Our next step was to examine specific epigenetic marks to determine whether epigenetic  
450 signatures generated from patients might differ from reference sets. This is important,  
451 as current assessments of the link between genetic risk and epigenetic signatures, for  
452 example, have relied entirely on the analysis of data generated from healthy adults [34,  
453 35].

454 We studied neutrophils collected from children with active, untreated JIA (ADU: 2  
455 individuals) and healthy controls (HC: 3 individuals). We first used ChIP-Seq to study  
456 two histone marks, H3K27ac and H3K4me1, typically associated with enhancer activity.  
457 We binned the human genome, then used edgeR [28] to call H3K4me1 and H3K27ac  
458 DERs with significant and robust alterations in ChIP-Seq signals (See Methods for  
459 detail). The definition and analysis of DERs between ADU and HC are shown in **Figure**  
460 **1a, 1b**. We identified 3,610 (average length: 3610 bps) H3K27ac and 5,098 (average  
461 length: 781 bps) H3K4me1 DERs gained in the ADU group (i.e., regions that were more  
462 enriched with histone modifications in the ADU than in the HC group). We also identified  
463 612 (average length: 1006 bps) H3K27ac and 865 (average length: 865 bps) H3K4me1  
464 DERs lost in the ADU group (**Figures 2a, 2b**) (i.e., regions that were more enriched for

465 H3K4me1 or H3K27ac in the HC group than in the ADU group). We note that ADU  
466 gained both more H3K27ac DERs and H3K4me1 DERs compared to HCs. The ADU  
467 loss DERs are significantly enriched in introns and depleted in intergenic regions when  
468 compared to genomic background; while the ADU gained DERs are significantly  
469 enriched in promoter regions (**Figure 2c**). Specifically, more than 90% of the H3K4me1  
470 loss DERs in ADU are located within introns.

471 We next investigated the DERs within gene promoter regions and non-promoter  
472 regions separately (we considered the regions from 5Kbs upstream to 1Kbs downstream  
473 around the transcription start site (TSS) to be promoter regions and designated other  
474 regions as non-promoter regions). The gained DERs were classified into three  
475 categories: (1) regions having both H3K27ac and H3K4me1 gains; (2) regions having  
476 only H3K27ac gains; or (3) regions having only H3K4me1 gains. Regions gaining both  
477 H3K27ac and H3K4me1 marks typically indicate increasing enhancer activity [36], so we  
478 initially focused on these regions. We found that, in both promoter and non-promoter  
479 regions, ADU gained more and lost fewer such DERs with both H3K27ac and H3K4me1  
480 marks (**S. Table2**). Taken together, these findings corroborate other studies that disease  
481 states are accompanied by significant alterations in the functional epigenomes of  
482 disease-relevant cells and highlight again the desirability of developing disease-specific  
483 “reference epigenomes” to complement data generated from healthy individuals.

484

#### 485 **Enhancer aberrations correlate with transcriptional alterations in JIA neutrophils**

486 We next examined the regulation potential of enhancer changes in JIA neutrophils using  
487 BETA software. [37] The regulation potential for a certain gene is a summary of both the  
488 number of regulatory elements nearby and the distances ( $\pm 5$ Kbs used in the study) to  
489 TSS. ADU gain H3K27ac DERs and H3K4me1 DERs both demonstrated activating and  
490 repressive functions on gene expression (p value  $< 10^{-6}$ ). While ADU loss H3K27ac and

491 H3K4me1 DERs showed no significant regulatory functions, this might be related to the  
492 small number of DERs in the two groups. We then identified DER-associated genes,  
493 also using windows of -5Kbs to +5Kbs around the TSS, and intersected these regions  
494 with our detected DERs, only those genes considered to be expressed in neutrophils  
495 were kept (see Methods and (**S.Table3**)). Using GO term analysis with GOrilla software  
496 [32] and the genes expressed in neutrophils as background, we found that the genes  
497 associated with ADU H3K27ac gained DERs were enriched for regulation of metabolic  
498 and biological processes. This finding is of interest given our previous report that JIA  
499 neutrophils display disordered regulation of metabolically-mediated oscillatory functions  
500 that are critical to myeloperoxidase and superoxide ion production [13]. The genes  
501 associated with H3K4me1 DERs gained in ADU were enriched for GO terms for the  
502 regulation of immune system processes, cell migration and cell adhesion. These  
503 processes are fundamental to neutrophil phagocytic functions, and we have recently  
504 identified aberrant patterns of expression for genes associated with cell migration and  
505 adhesion in whole blood expression data from children with untreated JIA [31]. Genes  
506 that associated with H3K27ac DERs loss in ADU were significantly enriched for immune  
507 system processes, regulation of cell activation and cell adhesion (**S.Table4**). All the  
508 DEGs which are associated with DERs are shown in **S.Table5**. Taken together, these  
509 findings demonstrate that alterations in H3K4me1/H3K27ac histone marks are  
510 associated with differential transcription in JIA neutrophils, and the identified H3K27ac  
511 and H3K4me1 alterations have observable effects on gene transcription as identified on  
512 RNA-Seq.

513 In contrast, the DMRs identified between ADU and HC were not significantly  
514 associated with differential gene expression when considering hyper- and hypo-  
515 methylated regions separately. We designated the genes that were (-5Kbs, 5Kbs) of

516 TSS or whose gene bodies intersected with DMRs as DMR-associated genes. We  
517 identified 160 expressed genes associated with hypermethylated DMRs and 100  
518 expressed genes associated with hypomethylated DMRs in the ADU group (**S. Table6**).  
519 However, GO analyses did not reveal any significantly enriched terms in biological  
520 processes. Only three ADU hypermethylated DMR-associated genes (*ADARB2*,  
521 *CNTNAP3B*, and *MYOM2*) showed significant differential expression in the ADU vs. HC  
522 comparison of RNA-Seq data. It should be noted that some of the DMRs are located  
523 within the H3K27ac and H3K4me1 enhancer regions (**S. Table7**) and may interact with  
524 enhancer elements and thus impact gene transcription indirectly.

525

### 526 **Therapy is associated with alterations in H3K4me1/H3K27ac-defined enhancer** 527 **marks within JIA neutrophils**

528 We next sought to determine whether epigenetic features seen in JIA neutrophils are a  
529 permanent feature of these cells. To accomplish this aim, we examined whether  
530 treatment with methotrexate, a first-line therapy for polyarticular JIA, impacts the  
531 epigenetic signatures observed in JIA neutrophils. For all H3K27ac or H3K4me1 DERs  
532 that we identified in the comparison of the ADU with HC groups, we examined the  
533 H3K27ac and H3K4me1 signal intensities within those DERs in children who had been  
534 on standard therapy with methotrexate for 6-8 weeks but still had active disease  
535 (designated the ADT group). The majority of ADU gain H3K27ac or H3K4me1 DERs  
536 (compared to HC) showed decreased H3K27ac or H3K4me1 marks after treatment  
537 (**Figure S3a,3b**). We identified 470 (average length: 705 bps) DERs gained H3K27ac in  
538 ADU compared with HC but then lost H3K27ac in ADT, and 818 (average length: 460  
539 bps) gained H3K4me1 in ADU then lost in ADT (**Figure 3a**). In other words, after  
540 treatment, these regions gaining the histone marks in the active disease state changed  
541 significantly toward levels identified in HC (**Figure 3c, 3d**); we designate these as “gain-

542 then-loss” DERs. On the other hand, a smaller number of DERs (33 for H3K27ac and  
543 13 for H3K4me1) gained H3K27ac or H3K4me1 in the ADU compared with HC and  
544 showed a further, significant H3K27ac or H3K4me1 gain in ADT vs ADU. We also  
545 detected the “loss-then-regain” DERs, that is, 55 (average length: 494 bps) H3K27ac  
546 DERs lost in ADU but then regain the mark in ADT and 140 (average length: 322 bps)  
547 DERs lost H3K4me1 in ADU then regain it in ADT (**Figure 3b**). These regions also  
548 demonstrated histone marks that were more similar, compared with the gain-then-loss  
549 DERs, to HC after the initiation of treatment (**Figure 3c, 3d**). Only a minority (4 for  
550 H3K27ac and 5 for H3K4me1) of DERs that lost H3K27ac or H3K4me1 showed a  
551 significant loss again in ADT. Taken together, these results demonstrate that after  
552 treatment is initiated, both H3K27ac and H3K4me1 marks are changed and more closely  
553 resemble the pattern seen in HC, especially for those enhancers that lost activity in  
554 active disease. The genes associated with those DERs were displayed in **S. Table8** and  
555 show similar expression levels in ADU, HC and ADT groups (**Figure S3c,3d**).

556

### 557 **Therapy exhibits unique H3K4me1/H3K27ac-defined enhancer marks within JIA** 558 **neutrophils**

559 From the RNA expression analysis, we have shown that the disease related genes  
560 (DEGs between ADU and HC) change their expression with treatment, although there  
561 are more genes differentially expressed in ADT compared with ADU. We hypothesized  
562 that therapy has a direct impact on patients’ neutrophils, possibly related to therapy-  
563 induced alterations in the epigenome. . In order to determine the  
564 treatment unique DERs (unique epigenetic changes produced by therapy), first we  
565 obtained the regions of those genomic loci having consistent histone marks (with  
566  $\log_2(\text{FC}) < 0.1$ ) between ADU and HC, then we obtained the DERs within these regions  
567 showing changed histone marks in ADT compared to non-ADT groups (both ADU and

568 HC). We found that ADT gained 38 (average length: 521 bps) H3K27ac DERs and 136  
569 (average length: 472 bps) H3K4me1 DERs (**Figure 3e**), and lost 47 (average length:  
570 440 bps) H3K27ac DERs and 93 (average length: 417 bps) H3K4me1 DERs compared  
571 with the non-ADT groups (**Figure 3f**). This finding indicates that, after treatment, the  
572 histone marks of these regions changed to a unique state other than ADU and HC  
573 (**Figure 3g, 3h**). The expressed genes associated with those ADT unique DERs are  
574 displayed in **S. Table 9**.

575 Taken together, these findings demonstrate that, even for functional signatures such  
576 as H3K4me1/H3K27ac, JIA neutrophil epigenomes are quite plastic and reordered by  
577 therapy. They point to the promise that building multi-dimensional genomic maps across  
578 a range of relevant cells may elucidate vexing questions surrounding treatment response  
579 and refractoriness in JIA.

580

### 581 **Genome-wide DNA methylation in JIA neutrophils: presence of disease-** 582 **associated methylation marks**

583 Both ENCODE and Roadmap Epigenomics project annotate DNA methylation across a  
584 broad spectrum of cell types. DNA methylation is an important epigenetic regulator of  
585 gene expression, and it is interesting to note that the first-line therapy for JIA,  
586 methotrexate, is thought to inhibit methyltransferase activity. Thus we compared  
587 genome-wide DNA methylation using MeDIP-Seq and MRE-Seq assays, in neutrophils  
588 of ADU patients, with genome-wide methylation patterns seen in HCs. As with histone-  
589 associated epigenetic marks, we identified distinct disease and disease-state  
590 methylation signatures in JIA neutrophils.

591 We identified 1,072 differentially methylated regions (DMRs), of 500bps each, when  
592 comparing ADU with HC subjects. Of these, 705 were hyper-methylated and 367 were  
593 hypo-methylated in the ADU group (**Figure S2a**). These DMRs were enriched in distal



594 intergenic regions and depleted in introns when compared to genomic background  
595 (**Figure S2b, c**), showing an opposite distribution compared to the two histone marks,  
596 H3K4me1 and H3K27ac. The methylation analysis showed that methylation changes  
597 between disease and healthy samples, supporting the idea that disease-specific data is  
598 likely to be useful in attempts to understand links between genetic variation and the  
599 epigenome. We next explored that question further.

600

### 601 **Link Between Genetics and Epigenetics**

602 We next sought to determine the degree to which underlying genetic variation might  
603 determine the epigenetic signatures we observed in JIA neutrophils. We started by  
604 examining regions of known genetic risk. We queried whether there was enrichment for  
605 enhancer mark changes in linkage disequilibrium (LD) blocks that encompassed the 40  
606 JIA-associated SNPs from the non-coding genome identified by Hinks et al [10]. We  
607 obtained the LD blocks of those SNPs from the SNAP database  
608 (<http://www.broadinstitute.org/mpg/snap>) reported by the 1000 Genomes Project pilot1  
609 and HapMap3 projects with the cutoff of  $r^2 < 0.9$ . We then identified 26 LD blocks  
610 containing 35 out of the 40 SNPs identified from the genetic fine mapping study. Some  
611 SNPs were within the same LD block, and 5 SNPs cannot be associated with any LD  
612 blocks. We found that within LD blocks containing JIA-associated SNPs, compared with  
613 HC, only a limited number of ADU gained or lost DERs were found. Among them, the 5  
614 LD blocks with ADU gained H3K27ac DERs and 6 LD blocks with ADU gained  
615 H3K4me1 DERs show statistical significance with p value  $< 0.01$  (permutation test by  
616 randomly selecting 26 other genomic regions with the same length of the 26 LD blocks  
617 10000 times and the average number of those 26 regions with ADU gained H3K27ac  
618 DERs is significant smaller than 5 and with ADU gained H3K4me1 DERs is significant  
619 smaller than 6). (**S.Table10**). We also investigated whether any of the differentially



620 methylated regions (DMRs) identified in JIA neutrophils were located within the 26 LD  
621 blocks harboring JIA-associated SNPs, but found none.

622 These findings point to the utility of this approach. The regions where known genetic  
623 risk for JIA is associated with alterations in the functional epigenome will be of special  
624 interest to investigators interested in the mechanisms through which genetic variance  
625 alters non-coding genome function. Furthermore, these data provide a map that will  
626 sharply reduce the proportion of the involved haplotypes that need to be investigated  
627 (and therefore the number of SNPs that need to be tested) in functional assays. They  
628 also suggest that, at least in neutrophils, DNA methylation may not be an informative  
629 area of inquiry for studies aimed at understanding genetic effects on epigenetic  
630 alterations in JIA.

631

### 632 **Overlapping of regions with differentially enriched histone marks and DNA** 633 **methylation with whole genome DNA sequencing (WGS) variants**

634 We next sought to determine whether underlying epigenetic differences observed in the  
635 neutrophils of children with JIA (when compared to HC) might reflect underlying genetic  
636 variation beyond the established JIA haplotypes. Although GWAS and genetic fine  
637 mapping studies have identified regions of genetic risk for JIA [10], such studies have  
638 not truly been “genome-wide.” For example, the Hinks study [10] used the Illumina  
639 Immunochip, which queries 195,806 SNPs and 718 small insertions-deletions in regions  
640 of the genome that are of specific immunologic interest. In order to gain a broader  
641 understanding of genomic regions that exert effects on transcriptional control (including  
642 *trans* effects), we performed WGS on 48 children with JIA at an average sequencing  
643 depth of 39x (range 32-49x) using the Illumina X Ten platform at the New York Genome  
644 Center.

645 We took all categories of DER from either H3K27ac or H3K4me1 marks identified  
646 from the comparison between ADU and HC, considered their locations at promoter and  
647 non-promoter sites, and intersected these regions with JIA WGS variants (10,800,221  
648 SNPs and 1,177,966 indels). We found that 24.72% and 23.73% of H3K27ac/H3K4me1  
649 gain enhancer signals at promoter and non-promoter regions respectively co-localized  
650 with indels (**S.Table11**). Also, we found an average of 78.97% DERs (number of  
651 overlapping DERs range between 7 and 344, **S.Table11**) across different categories at  
652 promoter sites co-localized with SNPs. For 6 categories of DER at non-promoter sites,  
653 we identified between 2 to 694 overlapping DERs, with an average of 76.29% DERs co-  
654 segregating with SNPs (all SNPs include known and novel SNPs, **S.Table11**). By using  
655 Fisher's Test with a cutoff p-value of  $\leq 0.01$ , enrichment fold  $\geq 1.5$ , and genetic variants  
656 of the 1000 Genomes Projects as background comparison, we did not observe  
657 enrichment of JIA variants within any of the 6 categories (**S.Table11**) of the reported  
658 DERs.

659 Next, we interrogated the DERs that showed potential changes after treatment by  
660 examining the H3K4me1/H3K27ac signal intensity for DERs (ADU vs HC) in children  
661 who still had active disease (ADT). This yielded an average of 18.49% DERs with  
662 potential changes due to therapy which overlapped with indels from WGS in JIA  
663 patients. In total we found between 9 and 164 DERs from 4 categories overlapping JIA  
664 indels (**S.Table12**). On the other hand, we observed that an average of 72.29% DERs  
665 with potential changes due to therapy overlapped with SNPs from WGS on JIA patients.  
666 As tabulated in **S.Table12**, we detected 44 to 568 DER across 4 categories overlapping  
667 with SNPs. We did not see any JIA genetic variant enrichment (or depletion relative to  
668 genetic variants of the 1000 Genomes Projects) in those DERs where we observed  
669 dynamic changes associated with treatment (**S.Table12**). Thus, underlying genetic

670 variance was not strongly associated with differences in histone marks (at baseline or  
671 after therapy) in JIA neutrophils.

672  
673

674 **Overlap of differentially DNA methylated regions between patients and controls**  
675 **with whole genome DNA sequencing (WGS) variants**

676 We further determined whether differential DNA methylation as seen in JIA neutrophils  
677 could be accounted for by genetic variance between children with JIA and the  
678 populations represented the 1,000 Genomes Project. This analysis yielded 11% to 23%  
679 for different categories of DMR in ADU co-localized with indels found from WGS of 48  
680 JIA patients (**S.Table13**). Also, we found 77%-82% of DMRs co-segregated with SNPs  
681 discovered from WGS of JIA individuals. Enrichment analysis using the Fisher exact test  
682 on each category of the DMR (hyper or hypo methylated in ADU at non-promoter or  
683 promoter regions) was conducted to determine whether any DMR category is enriched  
684 with JIA genetic variants. We found no evidence of enrichment with Fisher exact test p-  
685 value  $\leq 0.01$  and enrichment fold  $\geq 1.5$  (**S.Table13**). Overall, our findings fail to support  
686 the idea that underlying genetic variance accounts in any significant way for the  
687 observed epigenetic differences in JIA neutrophils.

688

689 Taken together, these small, independently-acquired data sets do not indicate a strong  
690 association between genetic variation (as identified by the WGS data) and epigenetic  
691 alterations in JIA neutrophils. It seems likely that specific, directed experiments will be  
692 required to identify allelic effects on epigenetic signals at specific genomic locations[38].

693

694 **Discussion**

695 In the current work, we demonstrate the feasibility of developing informative, multi-  
696 dimensional genomic maps of JIA to study the interplay between genetics and  
697 epigenetics in this common childhood disease. We took the same approach used by the  
698 NIH ENCODE and Roadmap Epigenomics projects, seeking to gather the largest  
699 amount of information from the smallest number of samples as possible. We started by  
700 assuring ourselves that this parsimonious approach could recapitulate findings we have  
701 already published: i.e., that neutrophil transcriptomes are abnormal in JIA neutrophils  
702 and change over the course of therapy [12-16]. Having corroborated our previous work  
703 using a small number of samples for RNA-Seq, we proceeded to explore the kinds of  
704 information that might emerge from building a multi-dimensional genomic model from  
705 cross-sectional samples.

706 Our current work corroborates previous investigators' findings that there are disease-  
707 specific epigenetic changes that can be observed in peripheral blood cells of patients  
708 with chronic inflammatory diseases. For example, Jeffries et al reported distinct patterns  
709 of DNA methylation in CD4+ T cells of patients with systemic lupus erythematosus,  
710 which included hypomethylation of genes known to be involved in T cell activation and  
711 implicated in autoimmunity [39]. More recently, Seumois et al reported the presence of  
712 novel H3K4me1/H3K27ac-marked enhancers in primary human T cells. These  
713 enhancers were associated with asthma susceptibility and correlated with asthma-  
714 associated SNPs [40]. Our work here corroborates the idea that there are disease-  
715 specific alterations in the functional epigenome as indicated by H3K4me1/H3K27ac  
716 (enhancer) marks that were seen only in JIA neutrophils, as well as the absence of such  
717 marks in JIA neutrophils in regions where they are seen in healthy controls. The fact  
718 that we can corroborate findings from studies that were generated using larger numbers  
719 of samples supports the utility of generating such maps using small sample numbers.

720 The presence of novel epigenetic marks in JIA neutrophils did not broadly reflect  
721 underlying genetic variation as determined from either whole genome sequencing or  
722 reference to previously identified JIA-associated SNPs/haplotypes. We could account  
723 for no more than 26% of the epigenetic variation, as reflected in histone marks, in JIA  
724 neutrophils by underlying genetic variation as reflected in indels (**S.Table7**). At the  
725 same time, we found that 31% of the LD blocks containing the disease-associated SNPs  
726 identified by Hinks et al [10] (see **Tables S1** and **S2**) also had an H3K4me1/H3K27ac-  
727 marked region seen only in neutrophils of either of children with untreated disease or in  
728 neutrophils of healthy children but not children with JIA, treated or untreated . The  
729 neutrophil epigenome may be independent of underlying genetic variation, although  
730 larger studies using combined genetics-genomics approaches [38], are more likely to  
731 answer that question definitively. Our findings are consistent with recently published  
732 observations demonstrating that considerable variability in immune function in humans is  
733 determined by non-heritable factors[41]. Although there is clearly a measurable genetic  
734 component to JIA [10], and that genetic risk is located largely within the non-coding,  
735 functional genome [34], (a finding that JIA shares in common with other chronic  
736 inflammatory diseases [42]), our findings suggest the epigenetic differences we see  
737 between the neutrophils of children with JIA and those of healthy children may reflect  
738 environmental influences. These influences could include, of course, genetically  
739 mediated alterations in adaptive (T cell, B cell) immune function that are reflected in  
740 neutrophil epigenomes.

741 Our study pinpoints one environmental factor that impacts neutrophil epigenomes:  
742 the initiation of effective therapy. This study is the first, to our knowledge, to demonstrate  
743 that effective therapy for a chronic human disease alters the epigenome. Furthermore,  
744 alterations in the epigenome associated with therapy tended to “correct” the neutrophil  
745 epigenome closer to patterns found in the cells of healthy children, as shown in **Figure**

746 **S3.** Alterations in enhancer location included both poised (H3K4me1 marks) and active  
747 (H327ac marks) enhancers. Furthermore, even with this small number of samples, we  
748 were able to associate alterations in enhancer locations with alterations in gene  
749 expression. These findings support the idea that building genomic maps for each stage  
750 of therapy, from active disease through remission, as defined by the Wallace criteria [43]  
751 may be a useful approach to understanding the underlying biology of therapeutic  
752 response.

753 It was interesting to note that we did not see a strong correlation between changes in  
754 DNA methylation and changes in gene expression as they occurred with initiation of  
755 therapy in JIA neutrophils. There is good experimental evidence that DNA methylation  
756 does regulate gene expression in human neutrophils [44]. Our inability to identify a link  
757 between DNA methylation and gene expression with these samples very likely indicates  
758 an important limitation to this approach, which is likely to be insensitive to subtle links  
759 between epigenetic changes and gene expression. Under any circumstances, our  
760 experimental data suggest that the repositioning of enhancer marks has a stronger  
761 influence on gene expression than DNA methylation in the setting of therapeutic  
762 response in JIA, and support efforts to map important functional genomic elements in  
763 pathologically relevant cells in this disease.

764 Our data add another important element to the understanding of the genomic basis of  
765 JIA and other chronic inflammatory diseases. Multiple studies link genetic risk for  
766 chronic inflammatory diseases to previously annotated functional elements, including  
767 enhancers [34]:[42]. The presence of “disease-specific enhancers” adds another layer of  
768 complexity to the idea that many chronic inflammatory diseases may essentially be  
769 disorders of transcriptional control. The coordination of transcription on a genome-wide  
770 basis is a complex process involving multiple elements that regulate chromatin  
771 accessibility, transcription factor binding, and transcription initiation [17]. Thus, sorting

772 through the mechanisms through which genetic and epigenetic variation alter  
773 transcription needs to begin with the understanding that the epigenomes of peripheral  
774 blood cells (including the locations of functional elements) of patients with chronic  
775 inflammatory diseases are likely to be distorted compared to the reference ENCODE  
776 and/or Roadmap Epigenomics data.

777

778 **Conclusions** – In this study, we demonstrate the feasibility of generating multi-  
779 dimensional genomic maps for a complex childhood disease from small numbers of  
780 samples, following the approaches used in the ENCODE and Roadmap Epigenomics  
781 projects. We demonstrate that such maps can be used to identify the presence of  
782 disease and disease-state associated epigenetic alterations in peripheral blood cells and  
783 the plasticity of the epigenome during therapy for JIA. We also demonstrate that  
784 transcriptional alterations linked to epigenetic alterations can be identified. We were  
785 unable to unambiguously identify genetic variants (SNPs, indels) that overlapped with  
786 alterations the JIA neutrophil epigenomes, possibly because this parsimonious method  
787 for mapping epigenomes is insensitive for detecting such overlap. Taken together,  
788 however, our findings demonstrate the feasibility of generating well-mapped epigenomes  
789 in pathologically relevant cells in disease states using the same approaches as were  
790 used in the Roadmap Epigenomics project. We expect that the generation of such maps  
791 in other cell types (CD4+ T cells, monocytes, NK cells, etc) will provide a wealth of new  
792 information re: the underlying pathobiology of complex inflammatory diseases like JIA.

793

#### 794 **Acknowledgments of Funding**

795 This work was supported by grants from the National Institutes of Health (R01-AI084200  
796 and R01-AR060604 [JNJ]), the Oklahoma Center for the Advancement of Science and  
797 Technology (HR07-139 [JNJ]), and an Innovative Research Grant #5989 from the

798 Arthritis Foundation (JNJ). X.X, D.L., and T.W. are supported by NIH grants  
799 R01HG007354, R01HG007175, R01ES024992, U01CA200060, U24ES026699, and  
800 American Cancer Society Research Scholar grant RSG-14-049-01-DMC. This work was  
801 also supported by This work was also supported by the National Center for Advancing  
802 Translational Sciences of the National Institutes of Health under award number  
803 UL1TR001412 to the University at Buffalo. The funders had no role in study design, data  
804 collection and analysis, decision to publish, or preparation of the manuscript. The  
805 content is solely the responsibility of the authors and does not necessarily represent the  
806 official views of the NIH or the other funders.



807 **Author information**

808 Author Affiliations

809 Lisha Zhu, Michael J. Buck, Tao Liu: Department of Biochemistry, University at Buffalo,  
810 Buffalo, NY, USA

811 Kaiyu Jiang, Laiping Wong, Yanmin Chen, James N. Jarvis – Department of Pediatrics,  
812 University at Buffalo, Buffalo, NY, USA

813 Halima Moncrieffe, Laura Brungs McIntosh - Rheumatology Section, Cincinnati  
814 Children's Medical Center, Cincinnati, OH, USA

815 Xiaoyun Xing, Daofeng Li, Ting Wang – Department of Genetics, Washington University  
816 School of Medicine, St. Louis, MO, USA

817

818 Author Contributions

819 Lisha Zhu – Was primarily responsible for the computational analysis and the writing of  
820 the manuscript.

821 Kaiyu Jiang – Performed the laboratory procedures for ChIPseq and RNAseq data and  
822 assisted in data analysis and interpretation.

823 Laiping Wong – Performed the computational analyses on the whole genome  
824 sequencing data and assisted in writing the manuscript.

825 Michael J. Buck – Provided guidance with the ChIP sequencing procedures.

826 Yanmin Chen - Assisted with the laboratory procedures for ChIPseq and RNAseq data.

827 Halima Moncrieffe, Laura McIntosh – Assisted in sample acquisition and preparation.  
828 Assisted in data interpretation.

829 Tao Liu – Directed all aspects of the computational analysis

830 Xiaoyun Xing, Daofeng Li – Assisted with laboratory procedures and preliminary  
831 computational analysis of the methylation sequencing data.

832 Ting Wang – Directed the methylation sequencing.

833 James N. Jarvis – Designed the study. Assisted in data analysis and interpretation and  
834 writing of the manuscript.

835

836 **Competing interests**

837 The authors have declared that no competing interests exist

838 **Figure legends**

839 Figure 1. Graphic illustration of definitions and processing steps to identify DERs  
840 between ADU and HC. (a) Graphic sketch to show the definition of ADU  
841 H3K27ac/H3K4me1 gain and ADU loss DER, ADU gain DER has much higher  
842 histone mark signals than ADU loss DER. (b) A flowchart to show the steps to  
843 associate DERs with DEGs. Those genes with upstream 5 Kbs to downstream 5 Kbs  
844 of TSS contained DERs are defined as DERs associated genes, those genes further  
845 compared with DEGs between ADU and HC to obtain DERs associated DEGs.

846

847 Figure 2. Heatmap and genomic distribution of H3K27ac and H3K4me1 DERs  
848 between ADU and HC. (a) Heatmap of H3K27ac RPKM values. (b) Heatmap of  
849 H3K4me1 RPKM values. (c) Genomic distribution of H3K27ac and H3K4me1 DERs  
850 between ADU and HC. (Fisher's exact test for the difference between DERs and  
851 genome background, \*  $P < 10^{-6}$ ).

852

853 Figure 3. Treatment with methotrexate alters JIA neutrophil epigenomes. H3K27ac  
854 and H3K4me1 marks among ADU, HC and ADT of DERs identified in the  
855 comparison between ADU and HC which also changed significantly between ADU  
856 and ADT. Treatment also exhibits unique H3K27ac and H3K4me1 marks of DERs  
857 identified as significantly different between ADT and ADU & HC. (a) boxplot of  
858 H3K27ac levels of ADU H3K27ac gain DERs (left) and H3K4me1 levels ADU  
859 H3K4me1 gain DERs (right) (Fisher's exact test between ADU and HC, ADU and  
860 ADT; '\*' indicates  $10^{-4} < P \leq 10^{-2}$ ; '\*\*'  $10^{-5} < P \leq 10^{-4}$ ; '\*\*\*'  $P \leq 10^{-5}$ ). (b) boxplot of  
861 H3K27ac levels of ADU H3K27ac loss DERs (left) and H3K4me1 levels ADU  
862 H3K4me1 loss DERs (right). (c) Heatmap of H3K27ac and H3K4me1 marks of 268  
863 H3K27ac DERs between ADU and HC which were also significantly changed  
864 between ADU and ADT. (d) Heatmap of H3K4me1 and H3K27ac marks of 778  
865 H3K4me1 DERs between ADU and HC which were also significantly changed

866 between ADU and ADT. (e) boxplot of H3K27ac levels of ADT H3K27ac gain DERs  
867 (left) and H3K4me1 levels ADT H3K4me1 gain DERs (right). (f) boxplot of H3K27ac  
868 levels of ADT H3K27ac loss DERs (left) and H3K4me1 levels ADT H3K4me1 loss  
869 DERs (right). (g) Heatmap of H3K27ac marks of 488 ADT unique H3K27ac DERs.  
870 (h) Heatmap of H3K4me1 marks of 1509 ADT unique H3K4me1 DERs.

871

872 Figure S1. Gene expression levels of differentially expressed genes (DEGs) between  
873 ADU and HC in three groups. (a) boxplot of FPKM values of ADU up-regulated DEGs  
874 between ADU and HC in ADU, HC and ADT groups. (b) boxplot of FPKM values of  
875 ADU down-regulated DGEs between ADU and HC in ADU, HC and ADT groups.

876

877 Figure S2. Heatmap and genomic distribution of DMRs between ADU and HC. (a)  
878 Heatmap of DMR RPKM values. Left: Z-score normalized values; Right: raw values.  
879 (c) Genomic distribution of hypermethylated and hypomethylated DMRs between  
880 ADU and HC. (Fisher's exact test for the difference between DERs and genome  
881 background, \*  $P < 10^{-6}$ ).

882

883 Figure S3. Treatment alters JIA neutrophil epigenomes. (a) boxplot of H3K27ac  
884 levels of total ADU H3K27ac gain DERs (left) and H3K4me1 levels total ADU  
885 H3K4me1 gain DERs (right) between ADU and HC in ADU, HC and ADT groups. (b)  
886 boxplot of H3K27ac levels of total ADU H3K27ac loss DERs (left) and H3K4me1  
887 levels total ADU H3K4me1 loss DERs (right) between ADU and HC in ADU, HC and  
888 ADT groups. (c) boxplot of gene expressions in FPKM values of genes associated  
889 with ADU H3K27ac gain DERs (left) and ADU H3K4me1 gain DERs (right) that  
890 identified in the comparison between ADU and HC which also changed significantly  
891 between ADU and ADT. (d) boxplot of gene expressions in FPKM values of genes  
892 associated with ADU H3K27ac loss DERs (left) and ADU H3K4me1 loss DERs  
893 (right).

894 References

- 895 1. Jirtle RL, Skinner MK. Environmental epigenomics and disease  
896 susceptibility. *Nat Rev Genet.* 2007;8(4):253-62. Epub 2007/03/17.  
897 doi: 10.1038/nrg2045. PubMed PMID: 17363974.
- 898 2. Johnstone SE, Baylin SB. Stress and the epigenetic landscape: a  
899 link to the pathobiology of human diseases? *Nat Rev Genet.*  
900 2010;11(11):806-12. Epub 2010/10/06. doi: 10.1038/nrg2881.  
901 PubMed PMID: 20921961; PubMed Central PMCID: PMC2148009.
- 902 3. Mohn F, Schubeler D. Genetics and epigenetics: stability and  
903 plasticity during cellular differentiation. *Trends Genet.*  
904 2009;25(3):129-36. Epub 2009/02/03. doi:  
905 10.1016/j.tig.2008.12.005. PubMed PMID: 19185382.
- 906 4. Bonasio R, Tu S, Reinberg D. Molecular signals of epigenetic  
907 states. *Science.* 2010;330(6004):612-6. Epub 2010/10/30. doi:  
908 10.1126/science.1191078. PubMed PMID: 21030644; PubMed Central  
909 PMCID: PMC272643.
- 910 5. Feil R, Fraga MF. Epigenetics and the environment: emerging  
911 patterns and implications. *Nat Rev Genet.* 2011;13(2):97-109. Epub  
912 2012/01/05. doi: 10.1038/nrg3142. PubMed PMID: 22215131.
- 913 6. Bjornsson HT, Fallin MD, Feinberg AP. An integrated epigenetic  
914 and genetic approach to common human disease. *Trends Genet.*  
915 2004;20(8):350-8. Epub 2004/07/21. doi: 10.1016/j.tig.2004.06.009.  
916 PubMed PMID: 15262407.
- 917 7. Liu Y, Aryee MJ, Padyukov L, Fallin MD, Hesselberg E, Runarsson  
918 A, et al. Epigenome-wide association data implicate DNA methylation  
919 as an intermediary of genetic risk in rheumatoid arthritis. *Nat*  
920 *Biotechnol.* 2013;31(2):142-7. Epub 2013/01/22. doi:  
921 10.1038/nbt.2487. PubMed PMID: 23334450; PubMed Central PMCID:  
922 PMC2598632.
- 923 8. Absher DM, Li X, Waite LL, Gibson A, Roberts K, Edberg J, et al.  
924 Genome-wide DNA methylation analysis of systemic lupus  
925 erythematosus reveals persistent hypomethylation of interferon genes  
926 and compositional changes to CD4+ T-cell populations. *PLoS Genet.*  
927 2013;9(8):e1003678. Epub 2013/08/21. doi:  
928 10.1371/journal.pgen.1003678. PubMed PMID: 23950730; PubMed  
929 Central PMCID: PMC3738443.
- 930 9. Glass DN, Giannini EH. Juvenile rheumatoid arthritis as a  
931 complex genetic trait. *Arthritis Rheum.* 1999;42(11):2261-8. Epub  
932 1999/11/11. doi: 10.1002/1529-0131(199911)42:11<2261::aid-  
933 anr1>3.0.co;2-p. PubMed PMID: 10555018.
- 934 10. Hinks A, Cobb J, Marion MC, Prahalad S, Sudman M, Bowes J, et  
935 al. Dense genotyping of immune-related disease regions identifies 14  
936 new susceptibility loci for juvenile idiopathic arthritis. *Nat Genet.*

- 937 2013;45(6):664-9. Epub 2013/04/23. doi: 10.1038/ng.2614. PubMed  
938 PMID: 23603761; PubMed Central PMCID: PMCPmc3673707.
- 939 11. Jarvis JN, Jiang K, Petty HR, Centola M. Neutrophils: the  
940 forgotten cell in JIA disease pathogenesis. *Pediatr Rheumatol Online J.*  
941 2007;5:13. Epub 2007/06/15. doi: 10.1186/1546-0096-5-13. PubMed  
942 PMID: 17567896; PubMed Central PMCID: PMCPmc1904449.
- 943 12. Jarvis JN, Petty HR, Tang Y, Frank MB, Tessier PA, Dozmorov I,  
944 et al. Evidence for chronic, peripheral activation of neutrophils in  
945 polyarticular juvenile rheumatoid arthritis. *Arthritis research &*  
946 *therapy.* 2006;8(5):R154. Epub 2006/09/28. doi: 10.1186/ar2048.  
947 PubMed PMID: 17002793; PubMed Central PMCID: PMCPmc1779452.
- 948 13. Jarvis JN, Jiang K, Frank MB, Knowlton N, Aggarwal A, Wallace  
949 CA, et al. Gene expression profiling in neutrophils from children with  
950 polyarticular juvenile idiopathic arthritis. *Arthritis Rheum.*  
951 2009;60(5):1488-95. Epub 2009/05/01. doi: 10.1002/art.24450.  
952 PubMed PMID: 19404961; PubMed Central PMCID: PMCPmc3063001.
- 953 14. Jiang K, Sun X, Chen Y, Shen Y, Jarvis JN. RNA sequencing from  
954 human neutrophils reveals distinct transcriptional differences  
955 associated with chronic inflammatory states. *BMC Med Genomics.*  
956 2015;8:55. Epub 2015/08/28. doi: 10.1186/s12920-015-0128-7.  
957 PubMed PMID: 26310571; PubMed Central PMCID: PMCPmc4551565.
- 958 15. Hu Z, Jiang K, Frank MB, Chen Y, Jarvis JN. Complexity and  
959 Specificity of the Neutrophil Transcriptomes in Juvenile Idiopathic  
960 Arthritis. *Scientific reports.* 2016;6:27453. Epub 2016/06/09. doi:  
961 10.1038/srep27453. PubMed PMID: 27271962; PubMed Central  
962 PMCID: PMCPMC4895221.
- 963 16. Jiang K, Frank M, Chen Y, Osban J, Jarvis JN. Genomic  
964 characterization of remission in juvenile idiopathic arthritis. *Arthritis*  
965 *research & therapy.* 2013;15(4):R100. Epub 2013/09/05. doi:  
966 10.1186/ar4280. PubMed PMID: 24000795; PubMed Central PMCID:  
967 PMCPmc4062846.
- 968 17. Komili S, Silver PA. Coupling and coordination in gene expression  
969 processes: a systems biology view. *Nat Rev Genet.* 2008;9(1):38-48.  
970 Epub 2007/12/12. doi: 10.1038/nrg2223. PubMed PMID: 18071322.
- 971 18. Kundaje A, Meuleman W, Ernst J, Bilenky M, Yen A, Heravi-  
972 Moussavi A, et al. Integrative analysis of 111 reference human  
973 epigenomes. *Nature.* 2015;518(7539):317-30. Epub 2015/02/20. doi:  
974 10.1038/nature14248. PubMed PMID: 25693563; PubMed Central  
975 PMCID: PMCPMC4530010.
- 976 19. Petty RE, Southwood TR, Manners P, Baum J, Glass DN,  
977 Goldenberg J, et al. International League of Associations for  
978 Rheumatology classification of juvenile idiopathic arthritis: second  
979 revision, Edmonton, 2001. *The Journal of rheumatology.*  
980 2004;31(2):390-2. PubMed PMID: 14760812.

- 981 20. Wallace CA, Ruperto N, Giannini E, Childhood A, Rheumatology  
982 Research A, Pediatric Rheumatology International Trials O, et al.  
983 Preliminary criteria for clinical remission for select categories of  
984 juvenile idiopathic arthritis. *The Journal of rheumatology*.  
985 2004;31(11):2290-4. PubMed PMID: 15517647.
- 986 21. Kim D, Pertea G, Trapnell C, Pimentel H, Kelley R, Salzberg SL.  
987 TopHat2: accurate alignment of transcriptomes in the presence of  
988 insertions, deletions and gene fusions. *Genome Biol*. 2013;14(4):R36.  
989 Epub 2013/04/27. doi: 10.1186/gb-2013-14-4-r36. PubMed PMID:  
990 23618408; PubMed Central PMCID: PMC4053844.
- 991 22. Trapnell C, Williams BA, Pertea G, Mortazavi A, Kwan G, van  
992 Baren MJ, et al. Transcript assembly and quantification by RNA-Seq  
993 reveals unannotated transcripts and isoform switching during cell  
994 differentiation. *Nat Biotechnol*. 2010;28(5):511-5. Epub 2010/05/04.  
995 doi: 10.1038/nbt.1621. PubMed PMID: 20436464; PubMed Central  
996 PMCID: PMC3146043.
- 997 23. Harrow J, Frankish A, Gonzalez JM, Tapanari E, Diekhans M,  
998 Kokocinski F, et al. GENCODE: the reference human genome  
999 annotation for The ENCODE Project. *Genome research*.  
1000 2012;22(9):1760-74. Epub 2012/09/08. doi: 10.1101/gr.135350.111.  
1001 PubMed PMID: 22955987; PubMed Central PMCID: PMC3431492.
- 1002 24. Trapnell C, Hendrickson DG, Sauvageau M, Goff L, Rinn JL,  
1003 Pachter L. Differential analysis of gene regulation at transcript  
1004 resolution with RNA-seq. *Nat Biotechnol*. 2013;31(1):46-53. Epub  
1005 2012/12/12. doi: 10.1038/nbt.2450. PubMed PMID: 23222703;  
1006 PubMed Central PMCID: PMC3869392.
- 1007 25. Li H, Durbin R. Fast and accurate short read alignment with  
1008 Burrows-Wheeler transform. *Bioinformatics*. 2009;25(14):1754-60.  
1009 Epub 2009/05/20. doi: 10.1093/bioinformatics/btp324. PubMed PMID:  
1010 19451168; PubMed Central PMCID: PMC2705234.
- 1011 26. Zhang Y, Liu T, Meyer CA, Eeckhoutte J, Johnson DS, Bernstein  
1012 BE, et al. Model-based analysis of ChIP-Seq (MACS). *Genome Biol*.  
1013 2008;9(9):R137. Epub 2008/09/19. doi: 10.1186/gb-2008-9-9-r137.  
1014 PubMed PMID: 18798982; PubMed Central PMCID: PMC2592715.
- 1015 27. Shin H, Liu T, Manrai AK, Liu XS. CEAS: cis-regulatory element  
1016 annotation system. *Bioinformatics*. 2009;25(19):2605-6. Epub  
1017 2009/08/20. doi: 10.1093/bioinformatics/btp479. PubMed PMID:  
1018 19689956.
- 1019 28. Robinson MD, McCarthy DJ, Smyth GK. edgeR: a Bioconductor  
1020 package for differential expression analysis of digital gene expression  
1021 data. *Bioinformatics*. 2010;26(1):139-40. Epub 2009/11/17. doi:  
1022 10.1093/bioinformatics/btp616. PubMed PMID: 19910308; PubMed  
1023 Central PMCID: PMC2796818.



- 1024 29. Zhang B, Zhou Y, Lin N, Lowdon RF, Hong C, Nagarajan RP, et  
1025 al. Functional DNA methylation differences between tissues, cell types,  
1026 and across individuals discovered using the M&M algorithm. *Genome*  
1027 *research*. 2013;23(9):1522-40. Epub 2013/06/28. doi:  
1028 10.1101/gr.156539.113. PubMed PMID: 23804400; PubMed Central  
1029 PMCID: PMCPmc3759728.
- 1030 30. Wong L, Jiang K, Chen Y, Jarvis JN. Genetic insights into juvenile  
1031 idiopathic arthritis derived from deep whole genome sequencing. *Sci*  
1032 *Rep*. 2017;7(1):2657. doi: 10.1038/s41598-017-02966-9. PubMed  
1033 PMID: 28572608.
- 1034 31. Jiang K, Wong L, Sawle AD, Frank MB, Chen Y, Wallace CA, et al.  
1035 Whole blood expression profiling from the TREAT trial: insights for the  
1036 pathogenesis of polyarticular juvenile idiopathic arthritis. *Arthritis*  
1037 *research & therapy*. 2016;18(1):157. Epub 2016/07/09. doi:  
1038 10.1186/s13075-016-1059-1. PubMed PMID: 27388672; PubMed  
1039 Central PMCID: PMCPMC4936089.
- 1040 32. Eden E, Navon R, Steinfeld I, Lipson D, Yakhini Z. GOrilla: a tool  
1041 for discovery and visualization of enriched GO terms in ranked gene  
1042 lists. *BMC Bioinformatics*. 2009;10:48. Epub 2009/02/05. doi:  
1043 10.1186/1471-2105-10-48. PubMed PMID: 19192299; PubMed Central  
1044 PMCID: PMCPmc2644678.
- 1045 33. Hu Z, Jiang K, Frank MB, Chen Y, Jarvis JN. Modeling  
1046 Transcriptional Rewiring in Neutrophils Through the Course of Treated  
1047 Juvenile Idiopathic Arthritis. *Scientific reports*. 2018;8(1):7805. Epub  
1048 2018/05/19. doi: 10.1038/s41598-018-26163-4. PubMed PMID:  
1049 29773851; PubMed Central PMCID: PMCPMC5958082.
- 1050 34. Jiang K, Zhu L, Buck MJ, Chen Y, Carrier B, Liu T, et al. Disease-  
1051 Associated Single-Nucleotide Polymorphisms From Noncoding Regions  
1052 in Juvenile Idiopathic Arthritis Are Located Within or Adjacent to  
1053 Functional Genomic Elements of Human Neutrophils and CD4+ T Cells.  
1054 *Arthritis Rheumatol*. 2015;67(7):1966-77. Epub 2015/04/03. doi:  
1055 10.1002/art.39135. PubMed PMID: 25833190; PubMed Central PMCID:  
1056 PMCPmc4485537.
- 1057 35. Zhu L, Jiang K, Webber K, Wong L, Liu T, Chen Y, et al.  
1058 Chromatin landscapes and genetic risk for juvenile idiopathic arthritis.  
1059 *Arthritis research & therapy*. 2017;19(1):57. Epub 2017/03/16. doi:  
1060 10.1186/s13075-017-1260-x. PubMed PMID: 28288683; PubMed  
1061 Central PMCID: PMCPMC5348874.
- 1062 36. Ernst J, Kheradpour P, Mikkelsen TS, Shores N, Ward LD,  
1063 Epstein CB, et al. Mapping and analysis of chromatin state dynamics in  
1064 nine human cell types. *Nature*. 2011;473(7345):43-9. Epub  
1065 2011/03/29. doi: 10.1038/nature09906. PubMed PMID: 21441907;  
1066 PubMed Central PMCID: PMCPmc3088773.



- 1067 37. Wang S, Sun H, Ma J, Zang C, Wang C, Wang J, et al. Target  
1068 analysis by integration of transcriptome and ChIP-seq data with BETA.  
1069 Nat Protoc. 2013;8(12):2502-15. Epub 2013/11/23. doi:  
1070 10.1038/nprot.2013.150. PubMed PMID: 24263090; PubMed Central  
1071 PMCID: PMCPmc4135175.
- 1072 38. Lowe WL, Jr., Reddy TE. Genomic approaches for understanding  
1073 the genetics of complex disease. Genome research.  
1074 2015;25(10):1432-41. Epub 2015/10/03. doi:  
1075 10.1101/gr.190603.115. PubMed PMID: 26430153; PubMed Central  
1076 PMCID: PMCPMC4579328.
- 1077 39. Jeffries MA, Dozmorov M, Tang Y, Merrill JT, Wren JD, Sawalha  
1078 AH. Genome-wide DNA methylation patterns in CD4+ T cells from  
1079 patients with systemic lupus erythematosus. Epigenetics.  
1080 2011;6(5):593-601. Epub 2011/03/26. PubMed PMID: 21436623;  
1081 PubMed Central PMCID: PMCPmc3121972.
- 1082 40. Seumois G, Chavez L, Gerasimova A, Lienhard M, Omran N,  
1083 Kalinke L, et al. Epigenomic analysis of primary human T cells reveals  
1084 enhancers associated with TH2 memory cell differentiation and asthma  
1085 susceptibility. Nat Immunol. 2014;15(8):777-88. Epub 2014/07/07.  
1086 doi: 10.1038/ni.2937. PubMed PMID: 24997565; PubMed Central  
1087 PMCID: PMCPmc4140783.
- 1088 41. Brodin P, Jojic V, Gao T, Bhattacharya S, Angel CJ, Furman D, et  
1089 al. Variation in the human immune system is largely driven by non-  
1090 heritable influences. Cell. 2015;160(1-2):37-47. Epub 2015/01/17.  
1091 doi: 10.1016/j.cell.2014.12.020. PubMed PMID: 25594173; PubMed  
1092 Central PMCID: PMCPmc4302727.
- 1093 42. Corradin O, Saiakhova A, Akhtar-Zaidi B, Myeroff L, Willis J,  
1094 Cowper-Sal Iari R, et al. Combinatorial effects of multiple enhancer  
1095 variants in linkage disequilibrium dictate levels of gene expression to  
1096 confer susceptibility to common traits. Genome research.  
1097 2014;24(1):1-13. Epub 2013/11/08. doi: 10.1101/gr.164079.113.  
1098 PubMed PMID: 24196873; PubMed Central PMCID: PMCPmc3875850.
- 1099 43. Wallace CA, Ruperto N, Giannini E. Preliminary criteria for clinical  
1100 remission for select categories of juvenile idiopathic arthritis. J  
1101 Rheumatol. 2004;31(11):2290-4. Epub 2004/11/02. PubMed PMID:  
1102 15517647.
- 1103 44. Chatterjee A, Stockwell PA, Rodger EJ, Duncan EJ, Parry MF,  
1104 Weeks RJ, et al. Genome-wide DNA methylation map of human  
1105 neutrophils reveals widespread inter-individual epigenetic variation.  
1106 Scientific reports. 2015;5:17328. Epub 2015/11/28. doi:  
1107 10.1038/srep17328. PubMed PMID: 26612583; PubMed Central  
1108 PMCID: PMCPmc4661471.  
1109

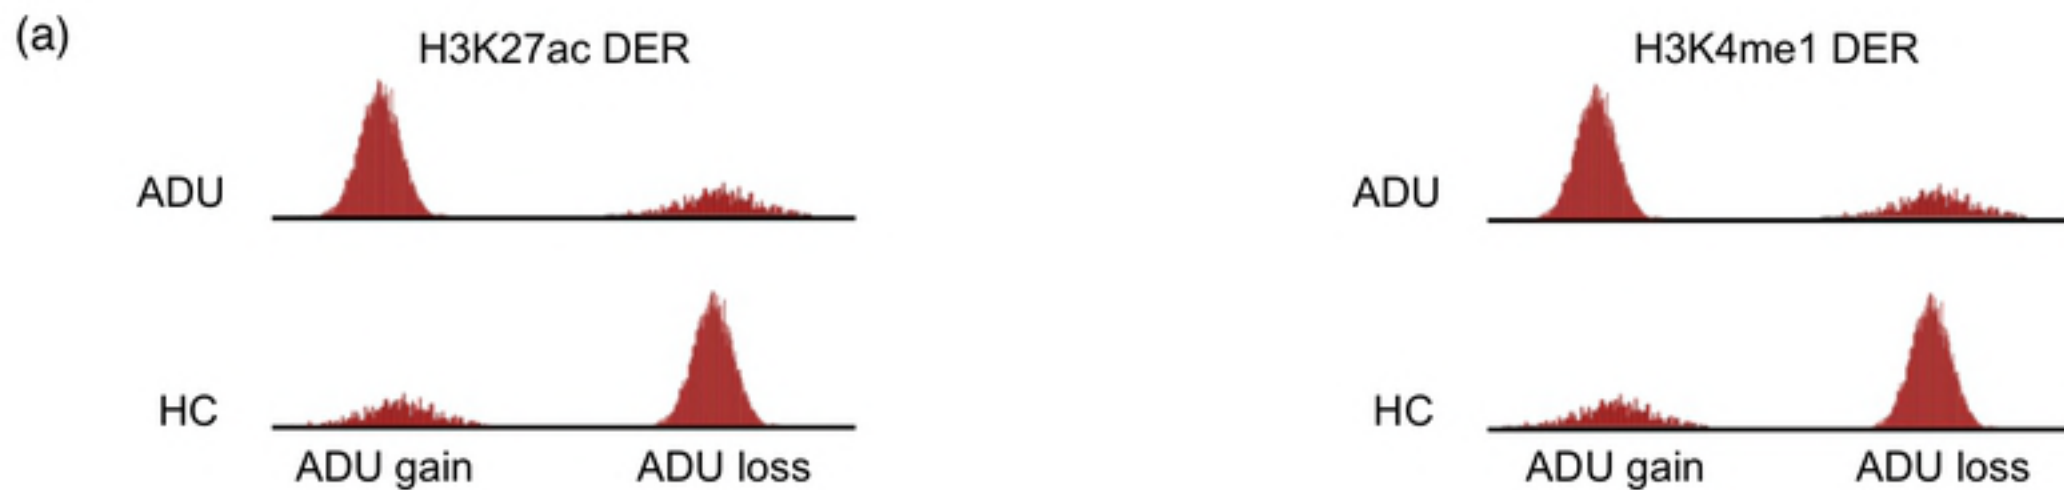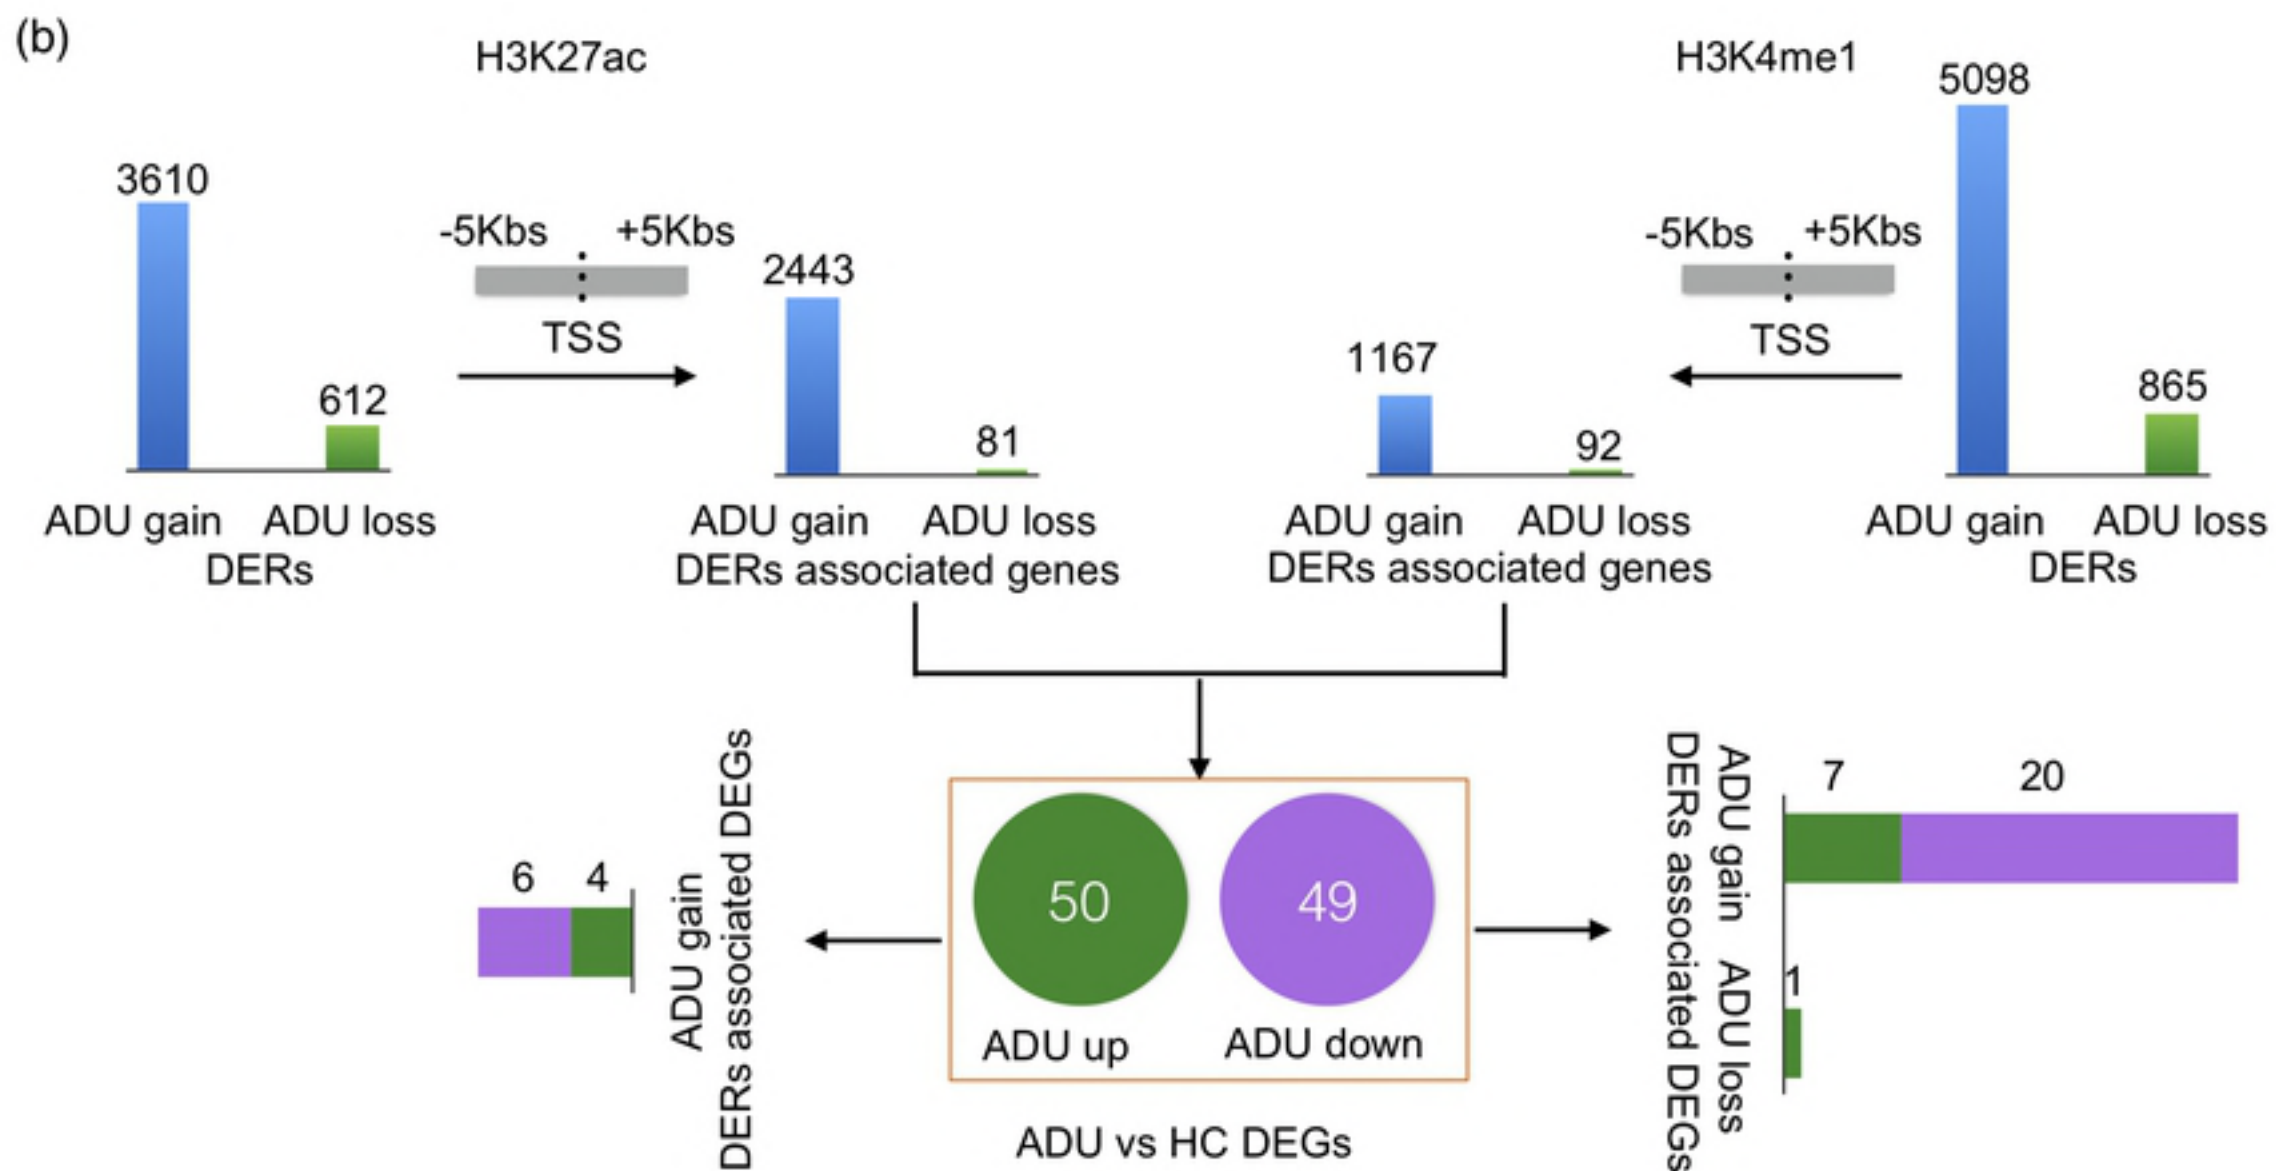

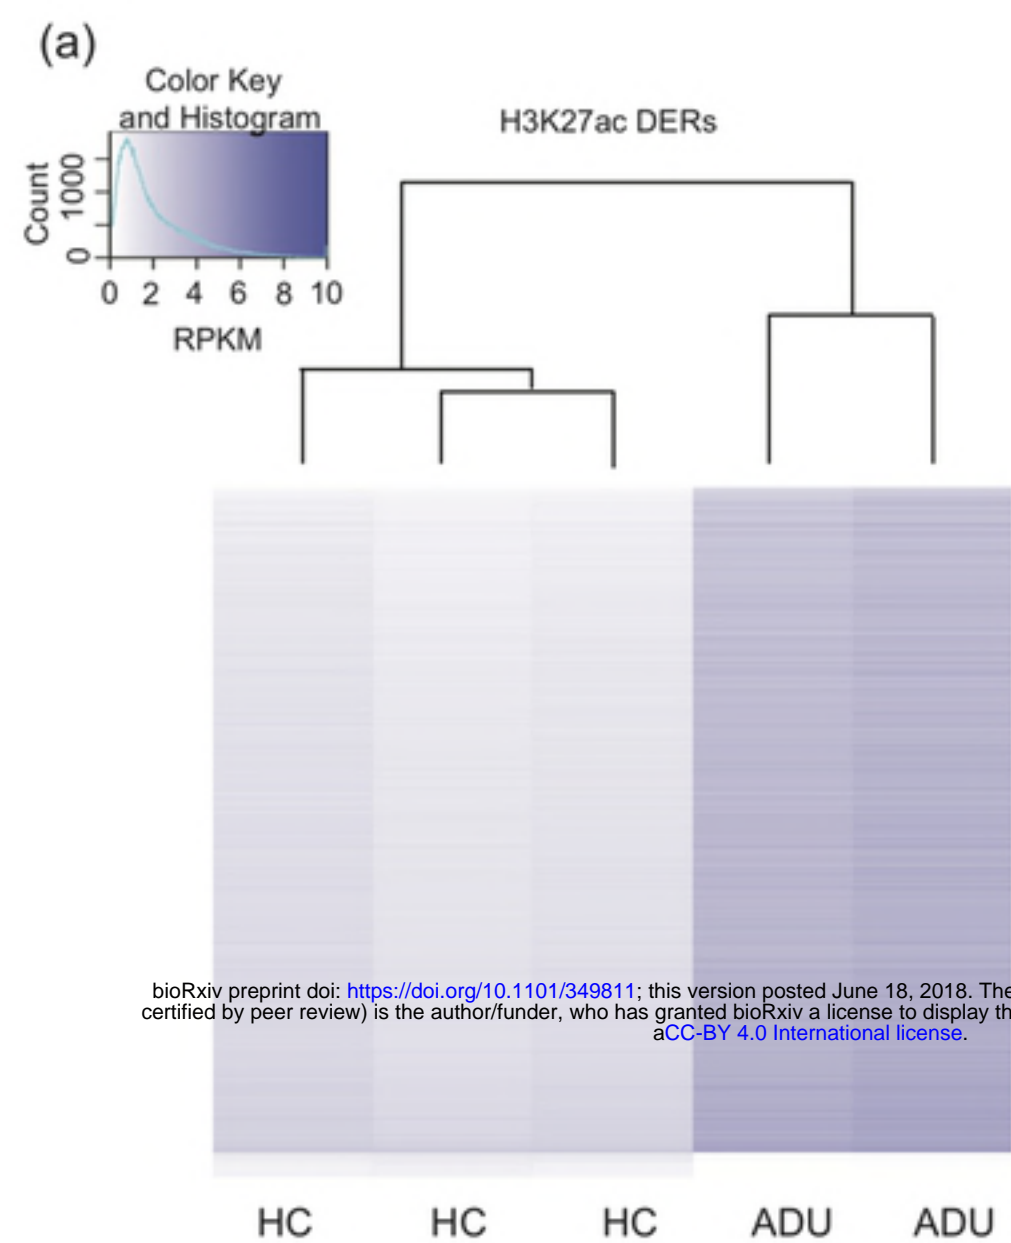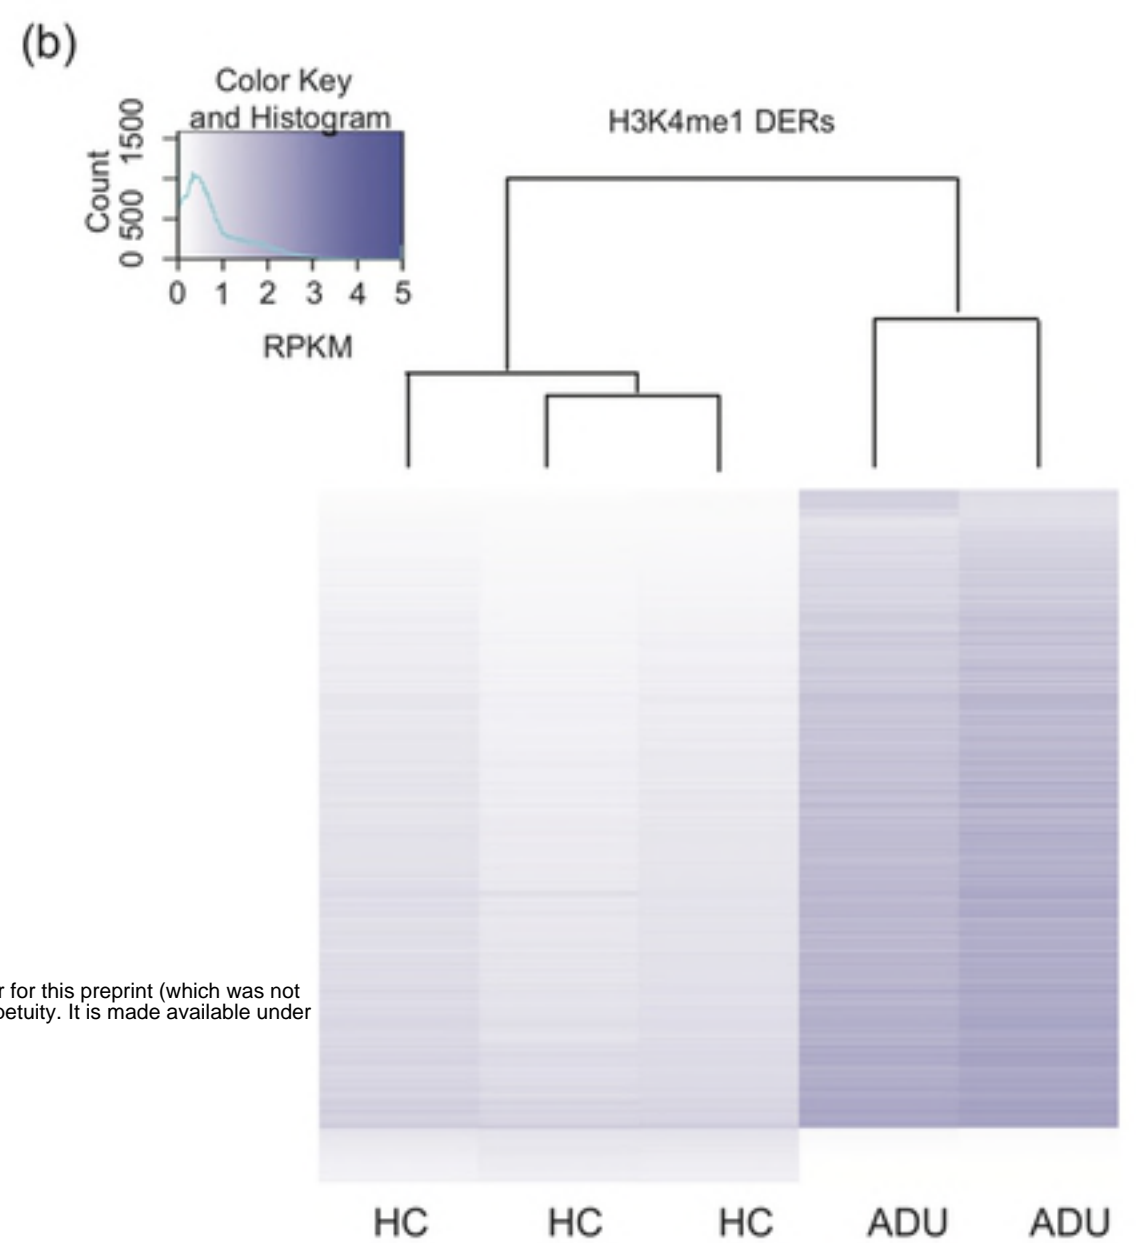

bioRxiv preprint doi: <https://doi.org/10.1101/349811>; this version posted June 18, 2018. The copyright holder for this preprint (which was not certified by peer review) is the author/funder, who has granted bioRxiv a license to display the preprint in perpetuity. It is made available under aCC-BY 4.0 International license.

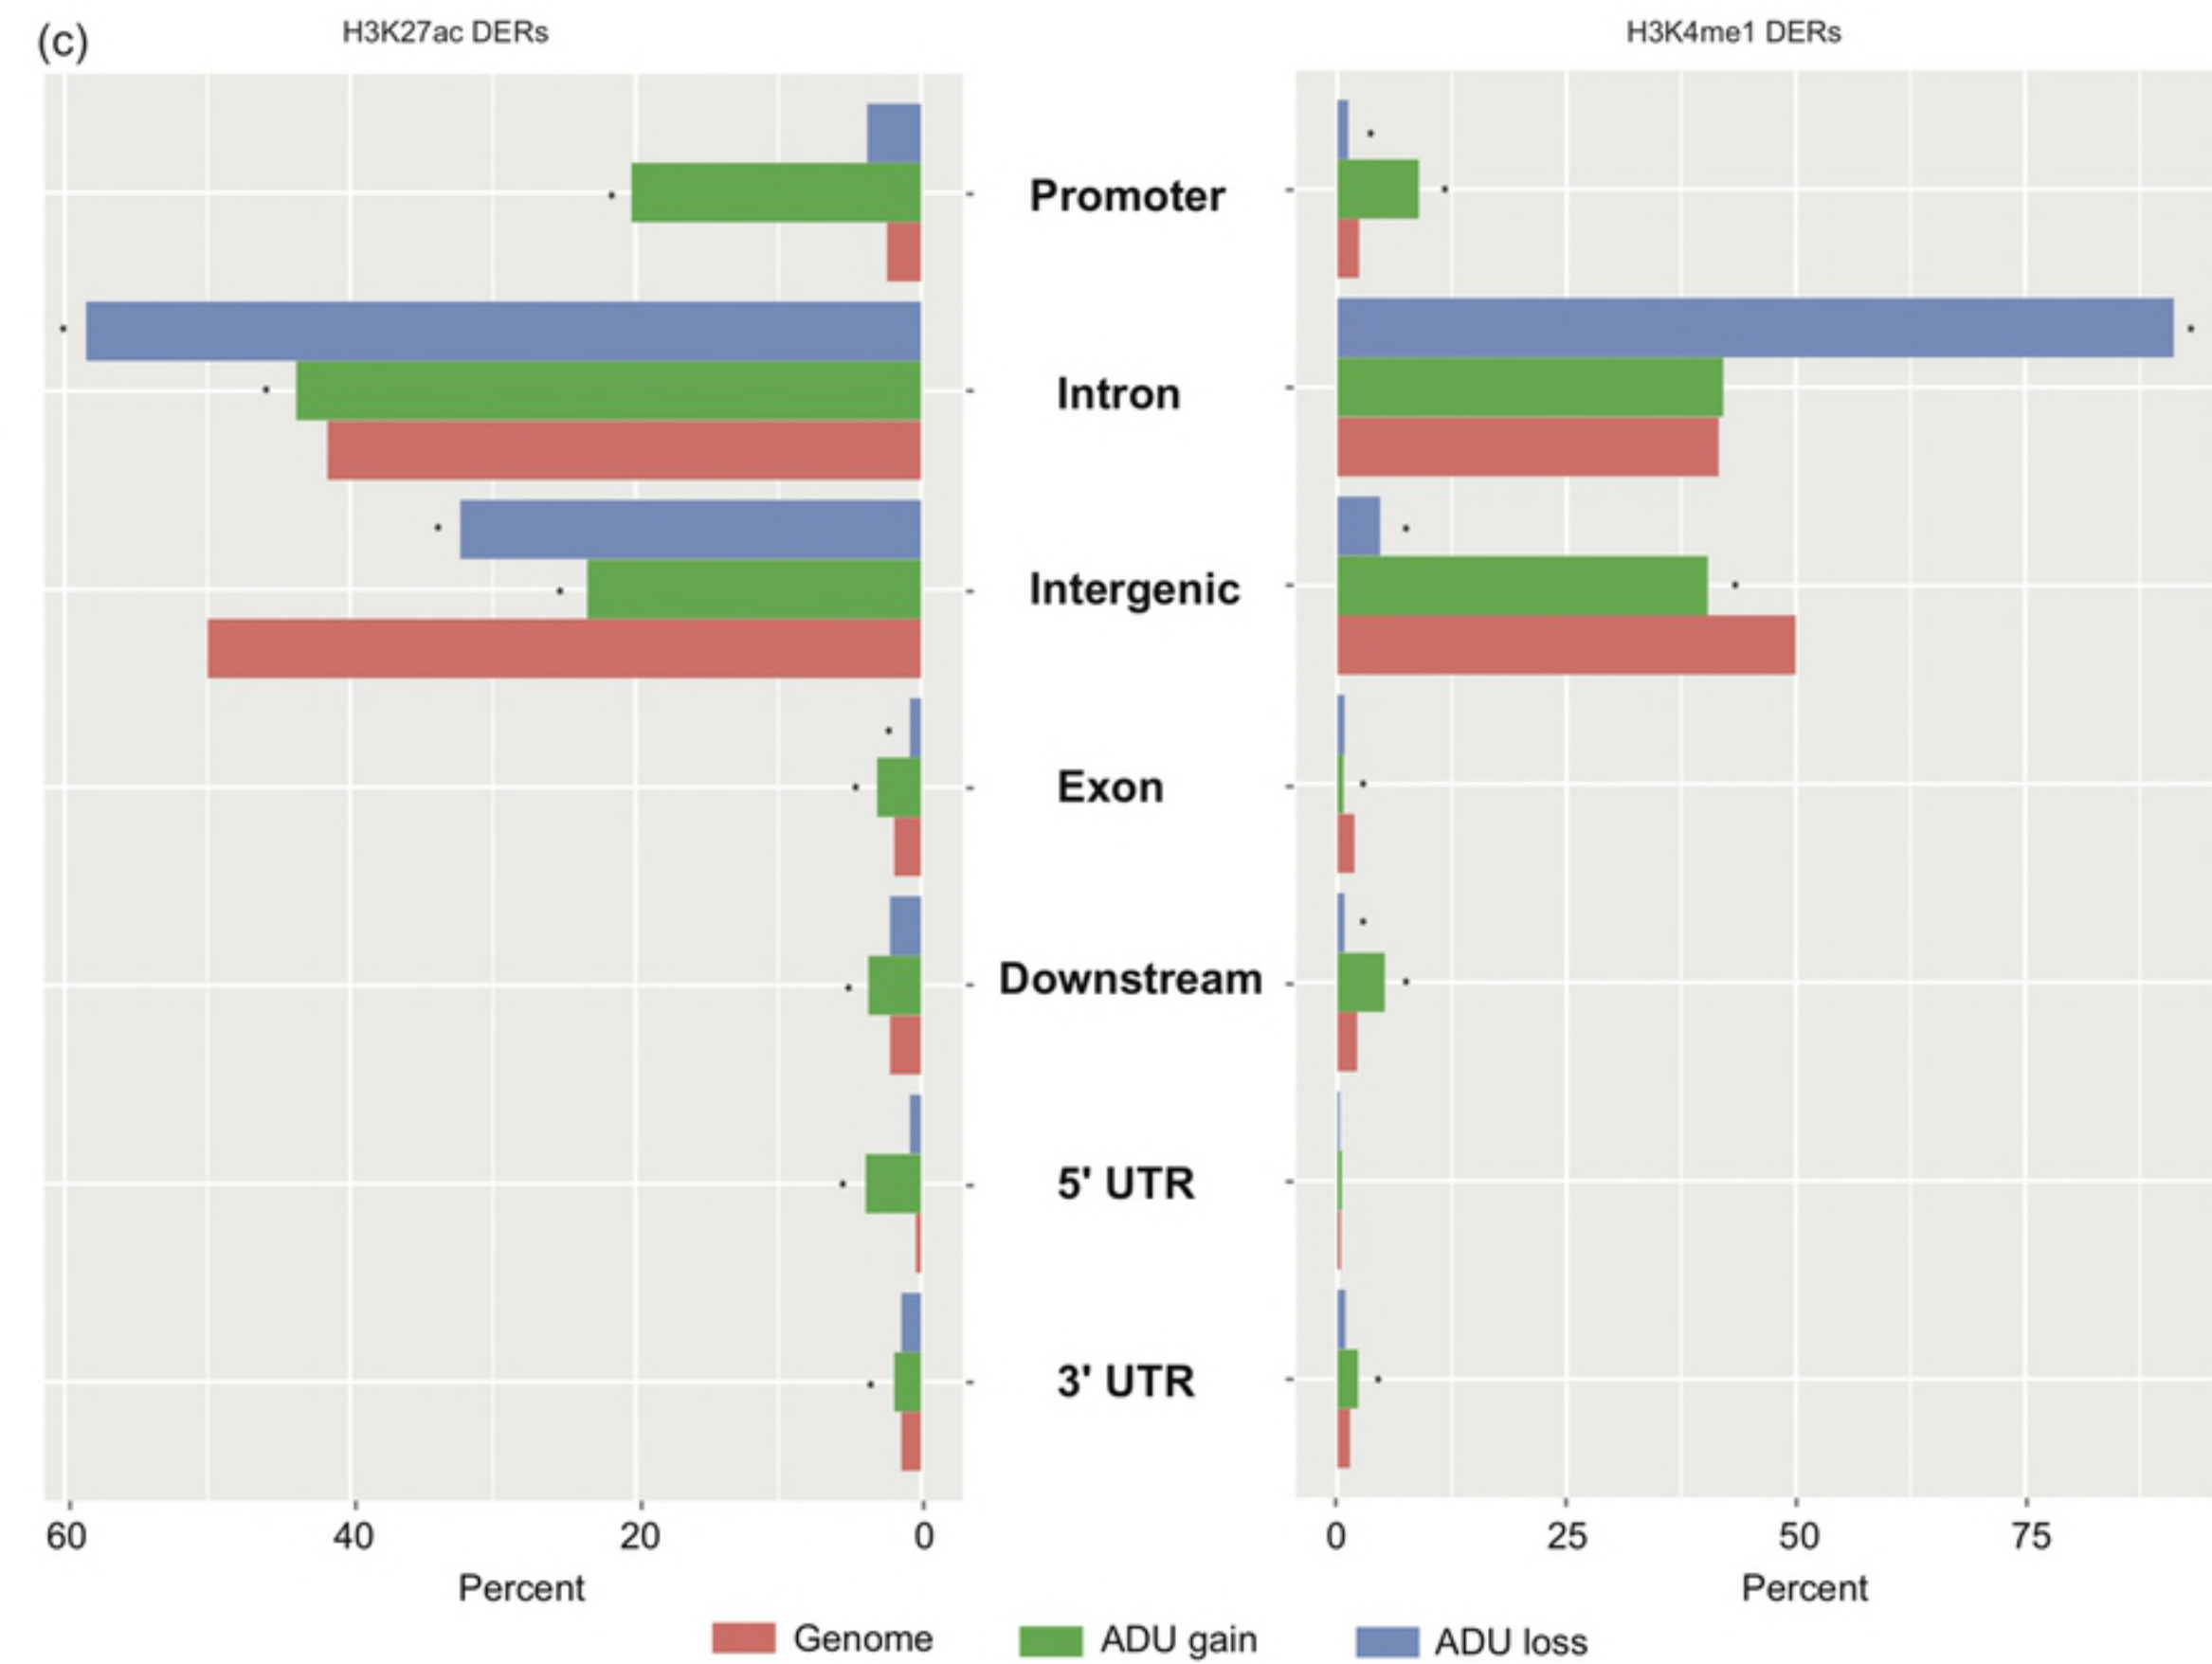



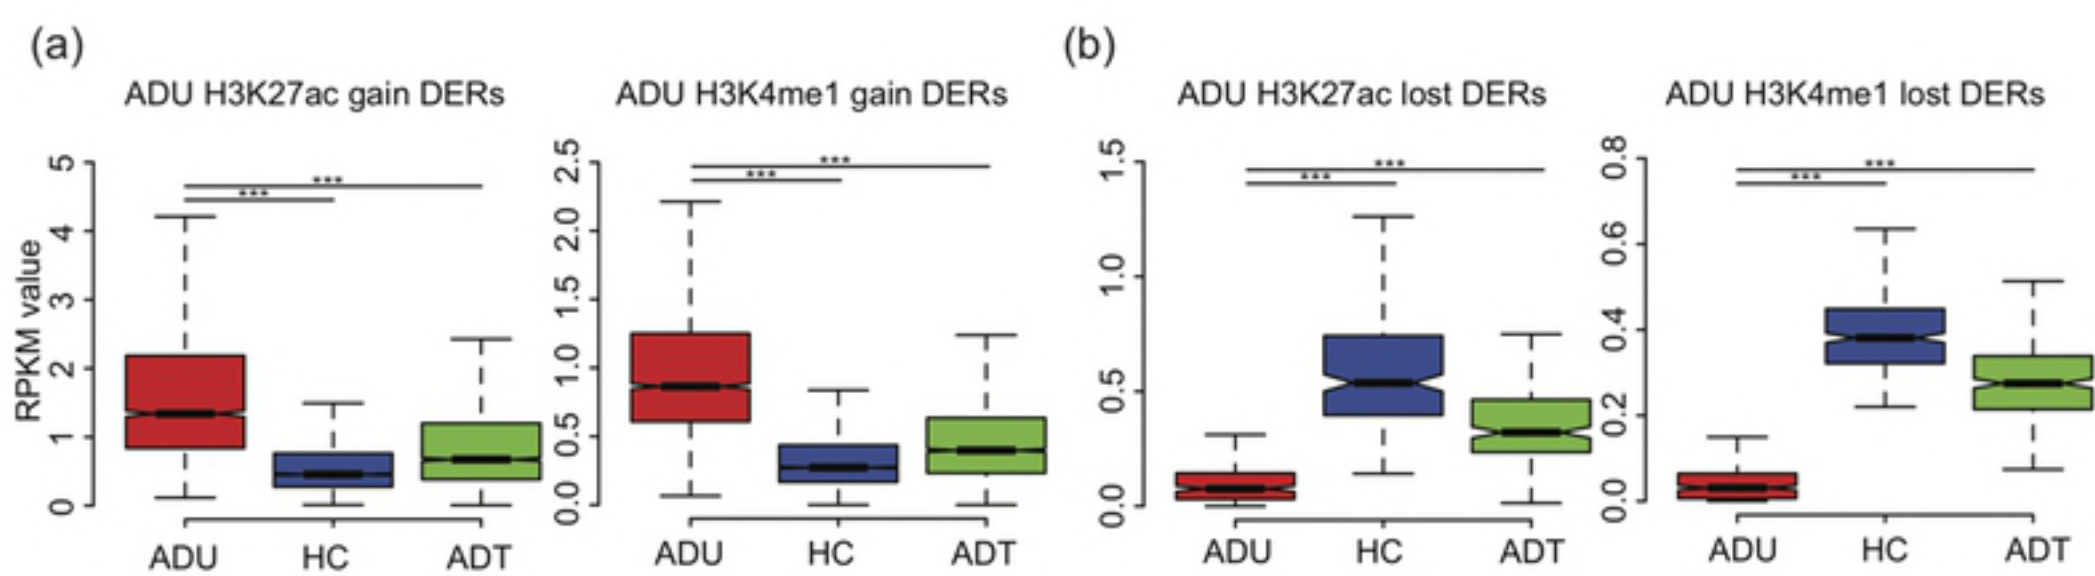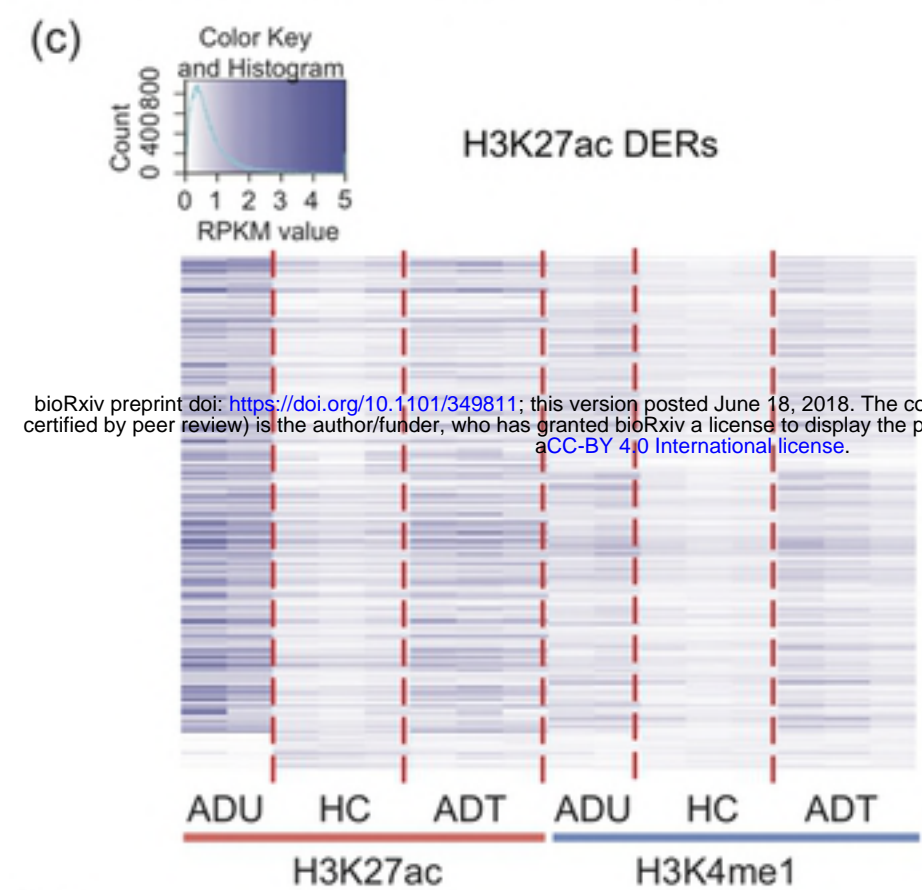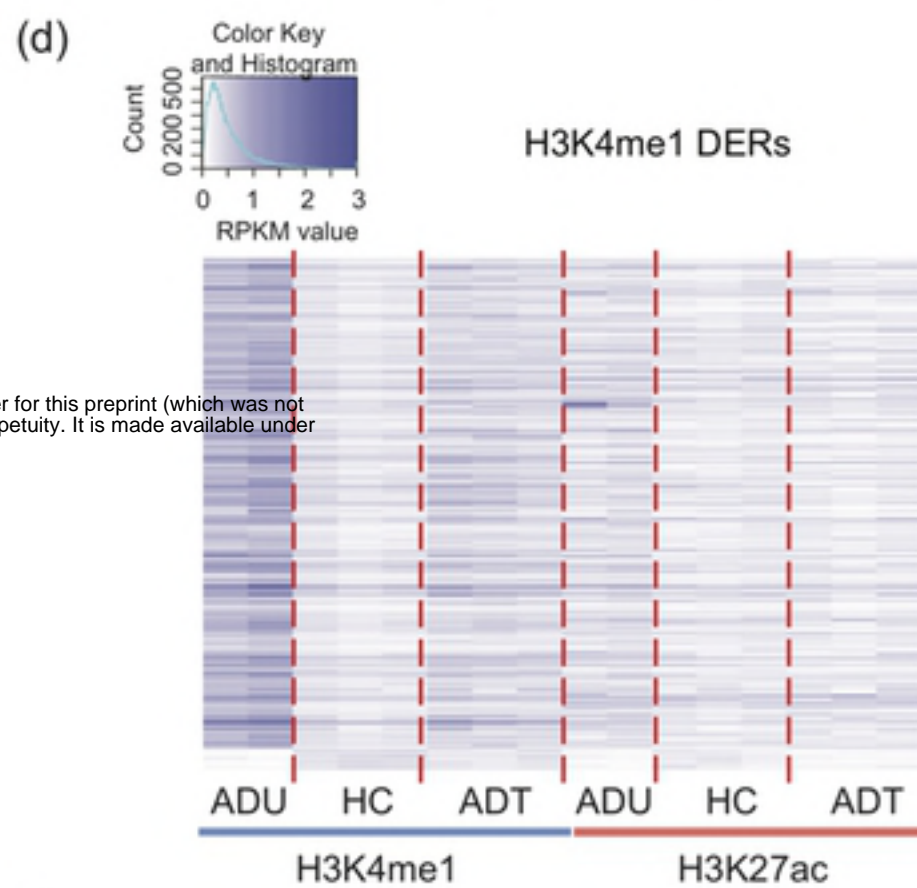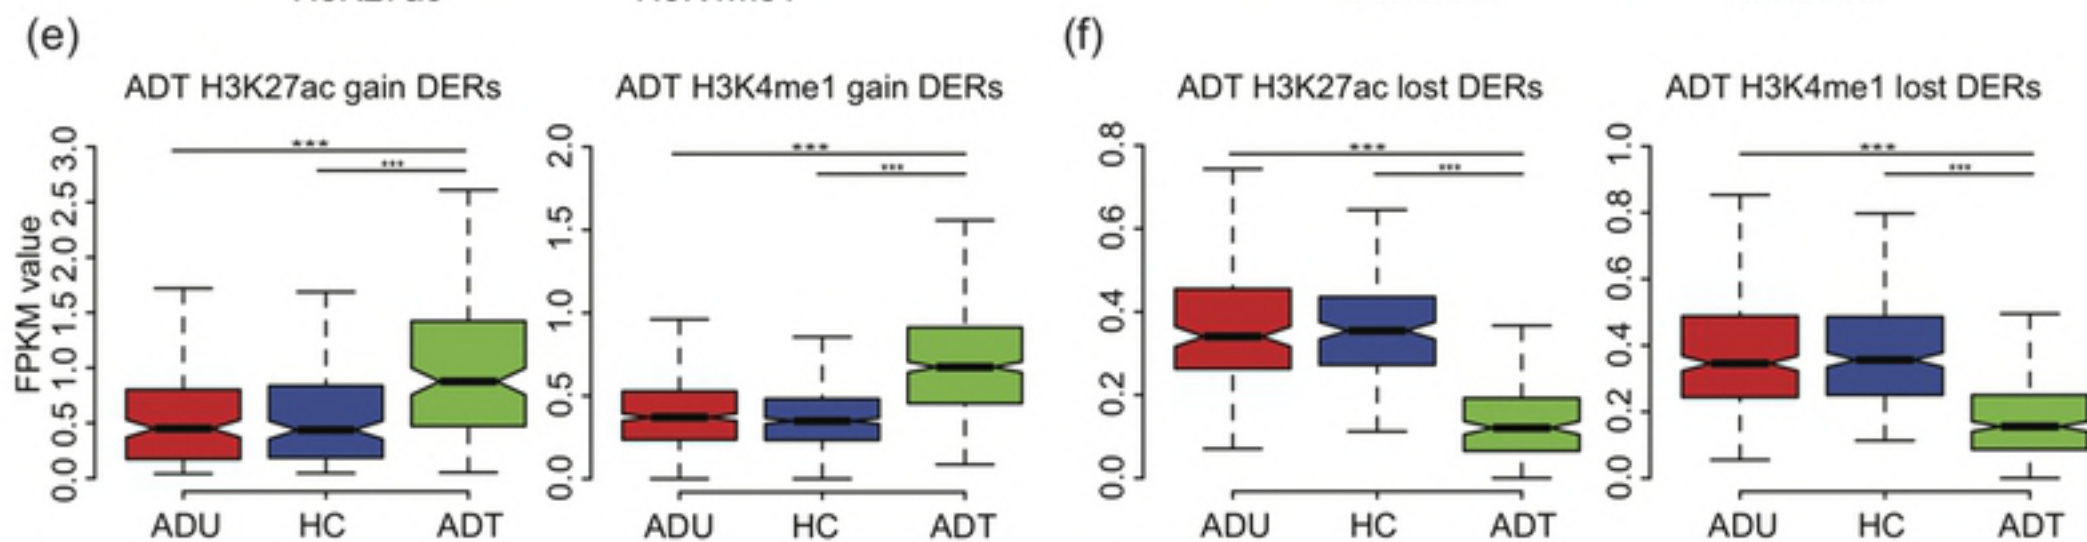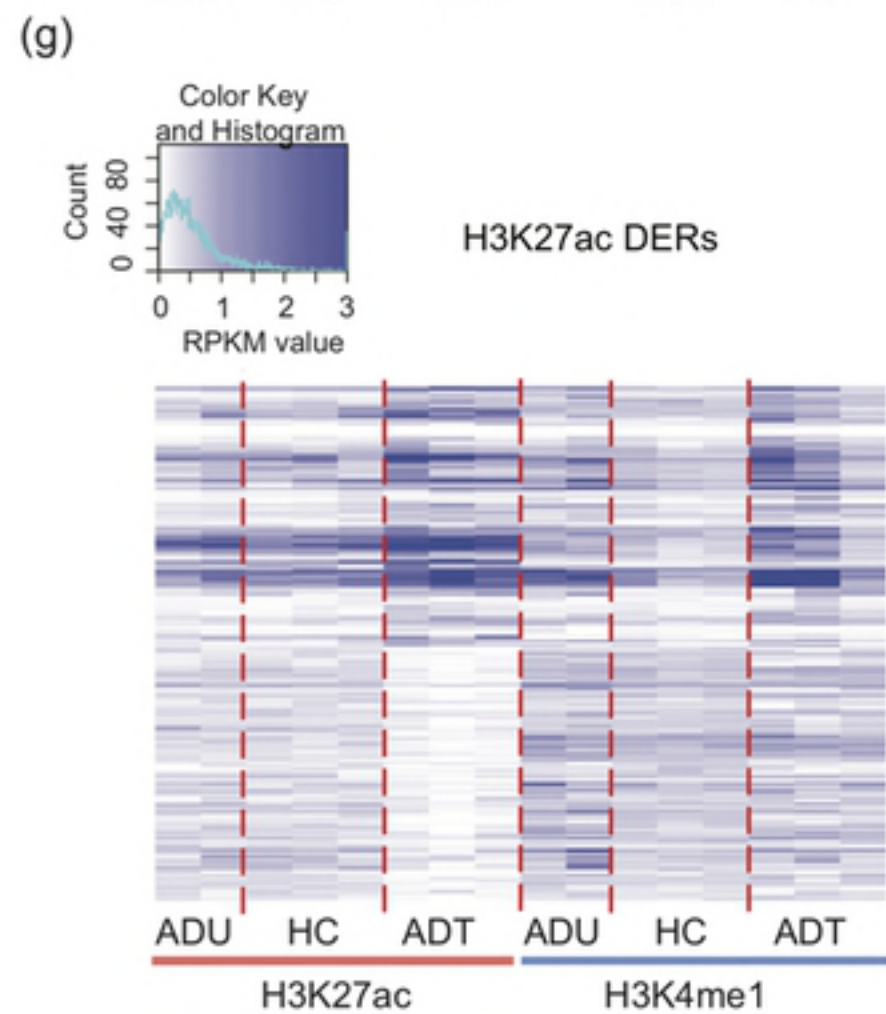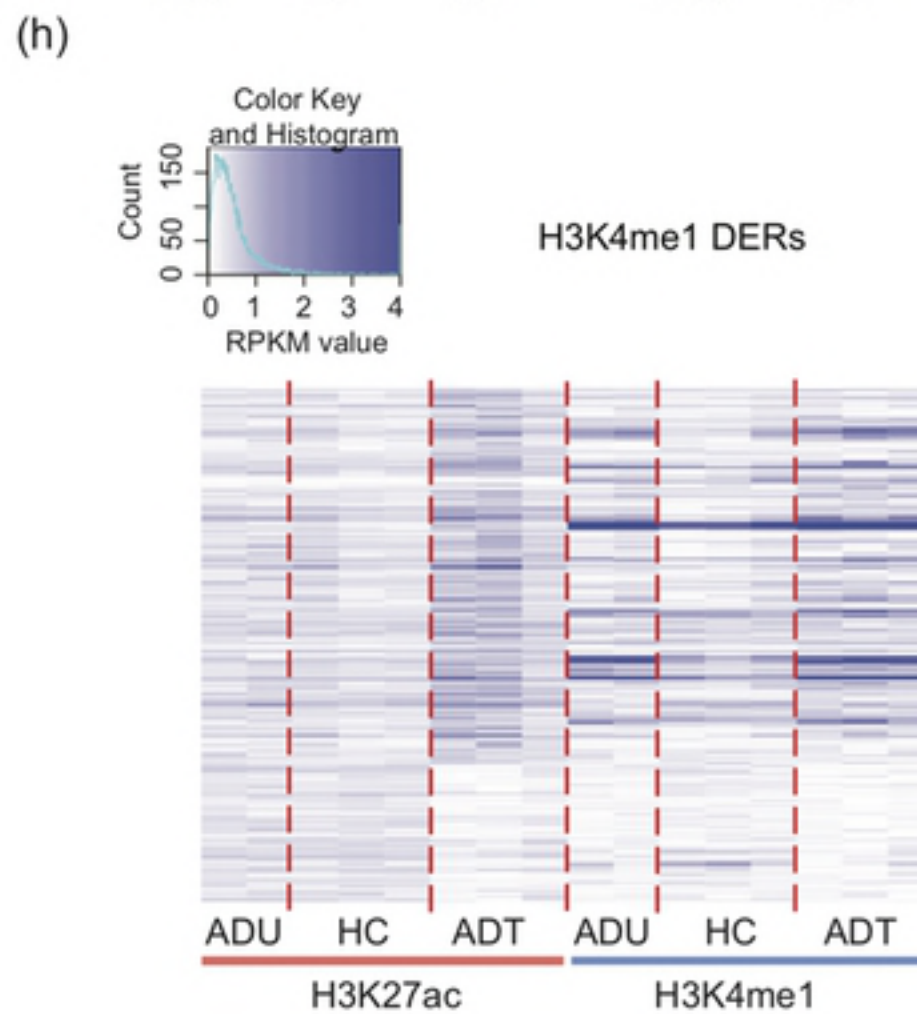

bioRxiv preprint doi: <https://doi.org/10.1101/349811>; this version posted June 18, 2018. The copyright holder for this preprint (which was not certified by peer review) is the author/funder, who has granted bioRxiv a license to display the preprint in perpetuity. It is made available under aCC-BY 4.0 International license.

(a) ADU up-regulated DEGs between ADU and HC

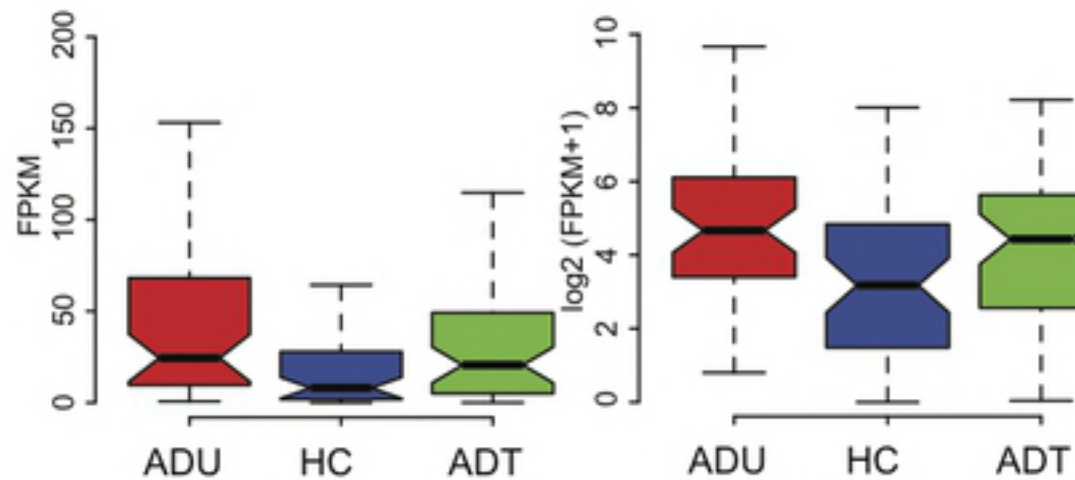

(b) HC up-regulated DEGs between ADU and HC

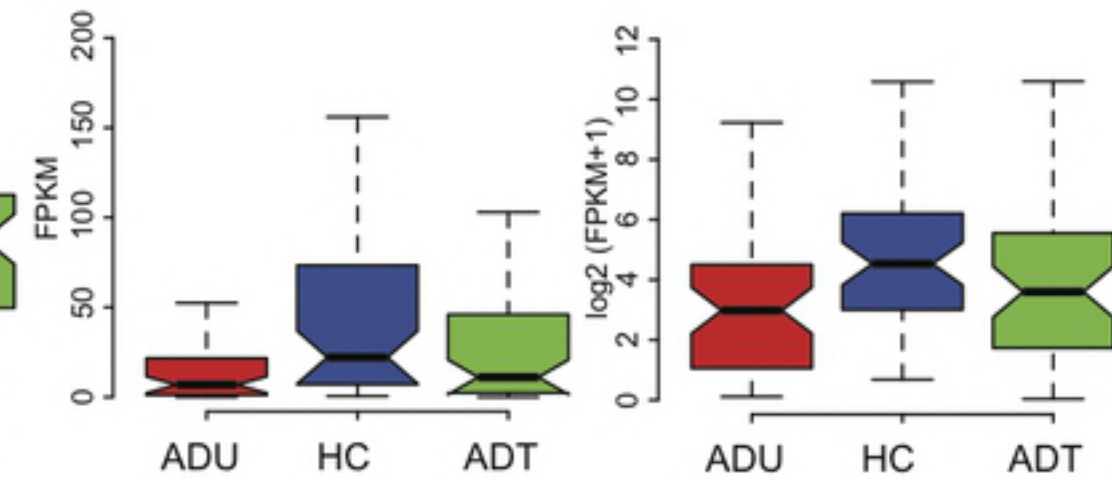

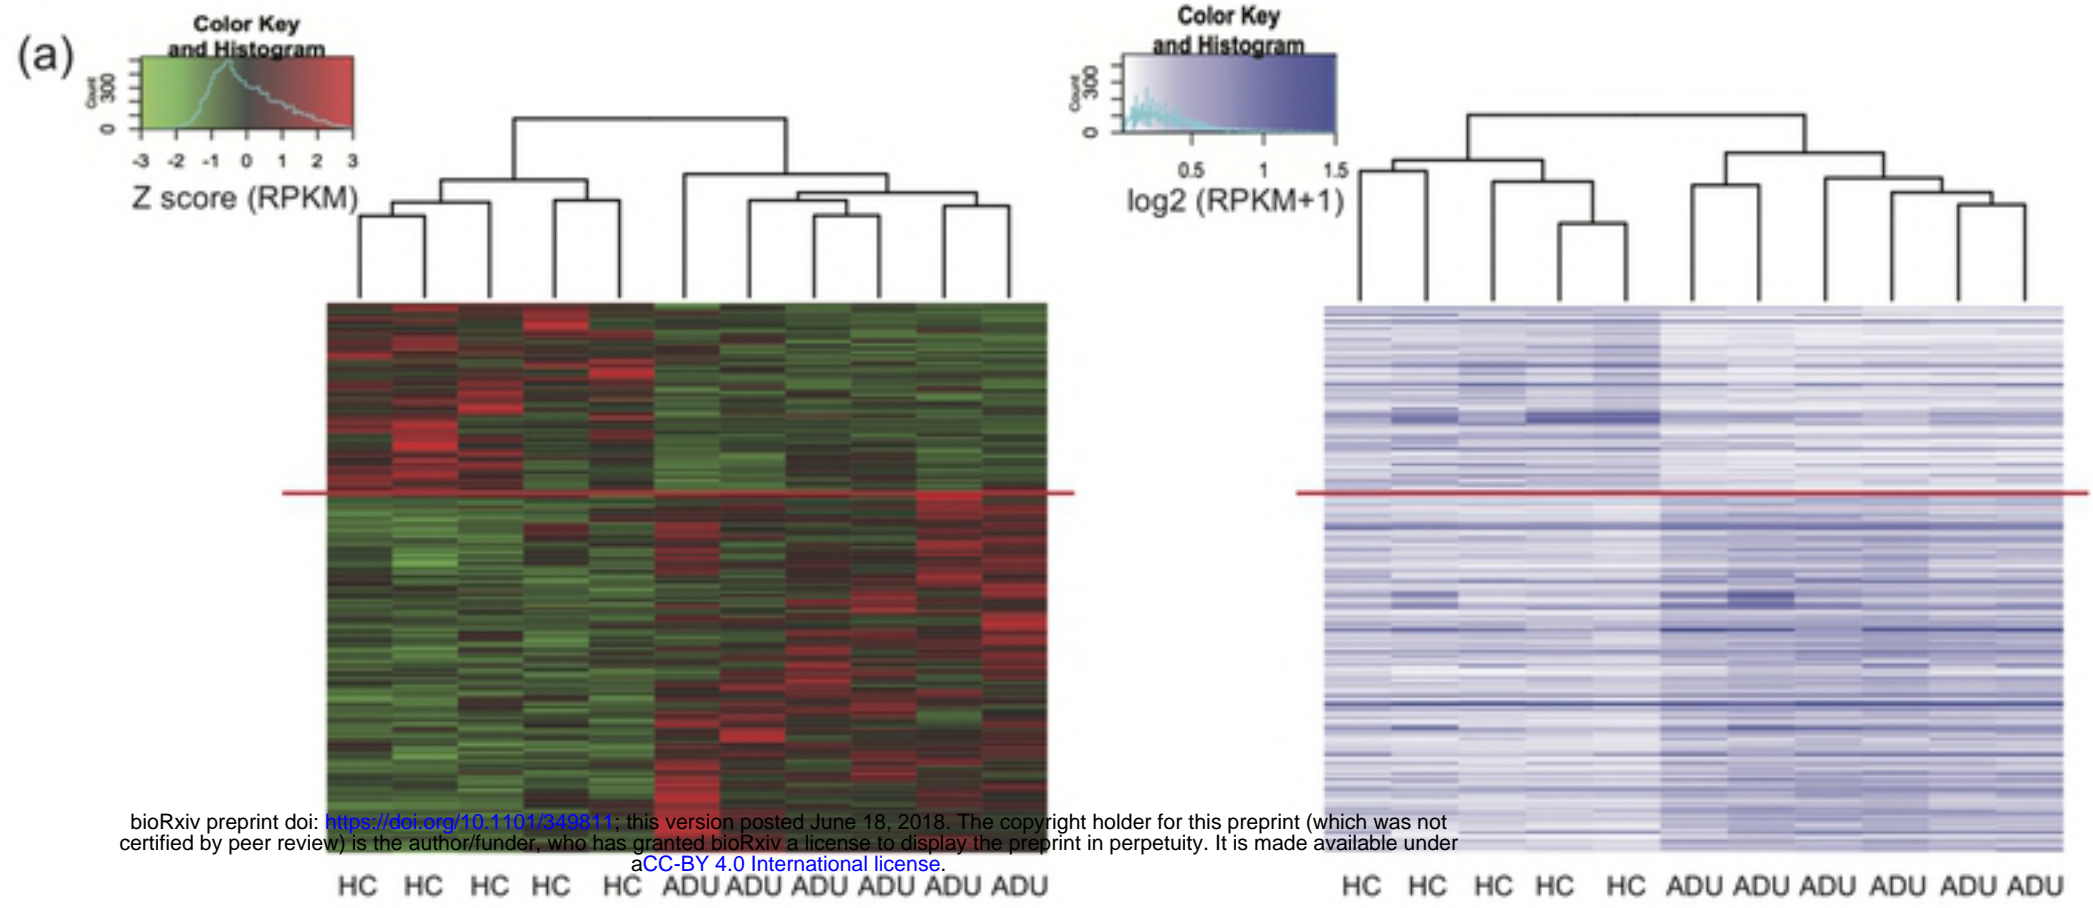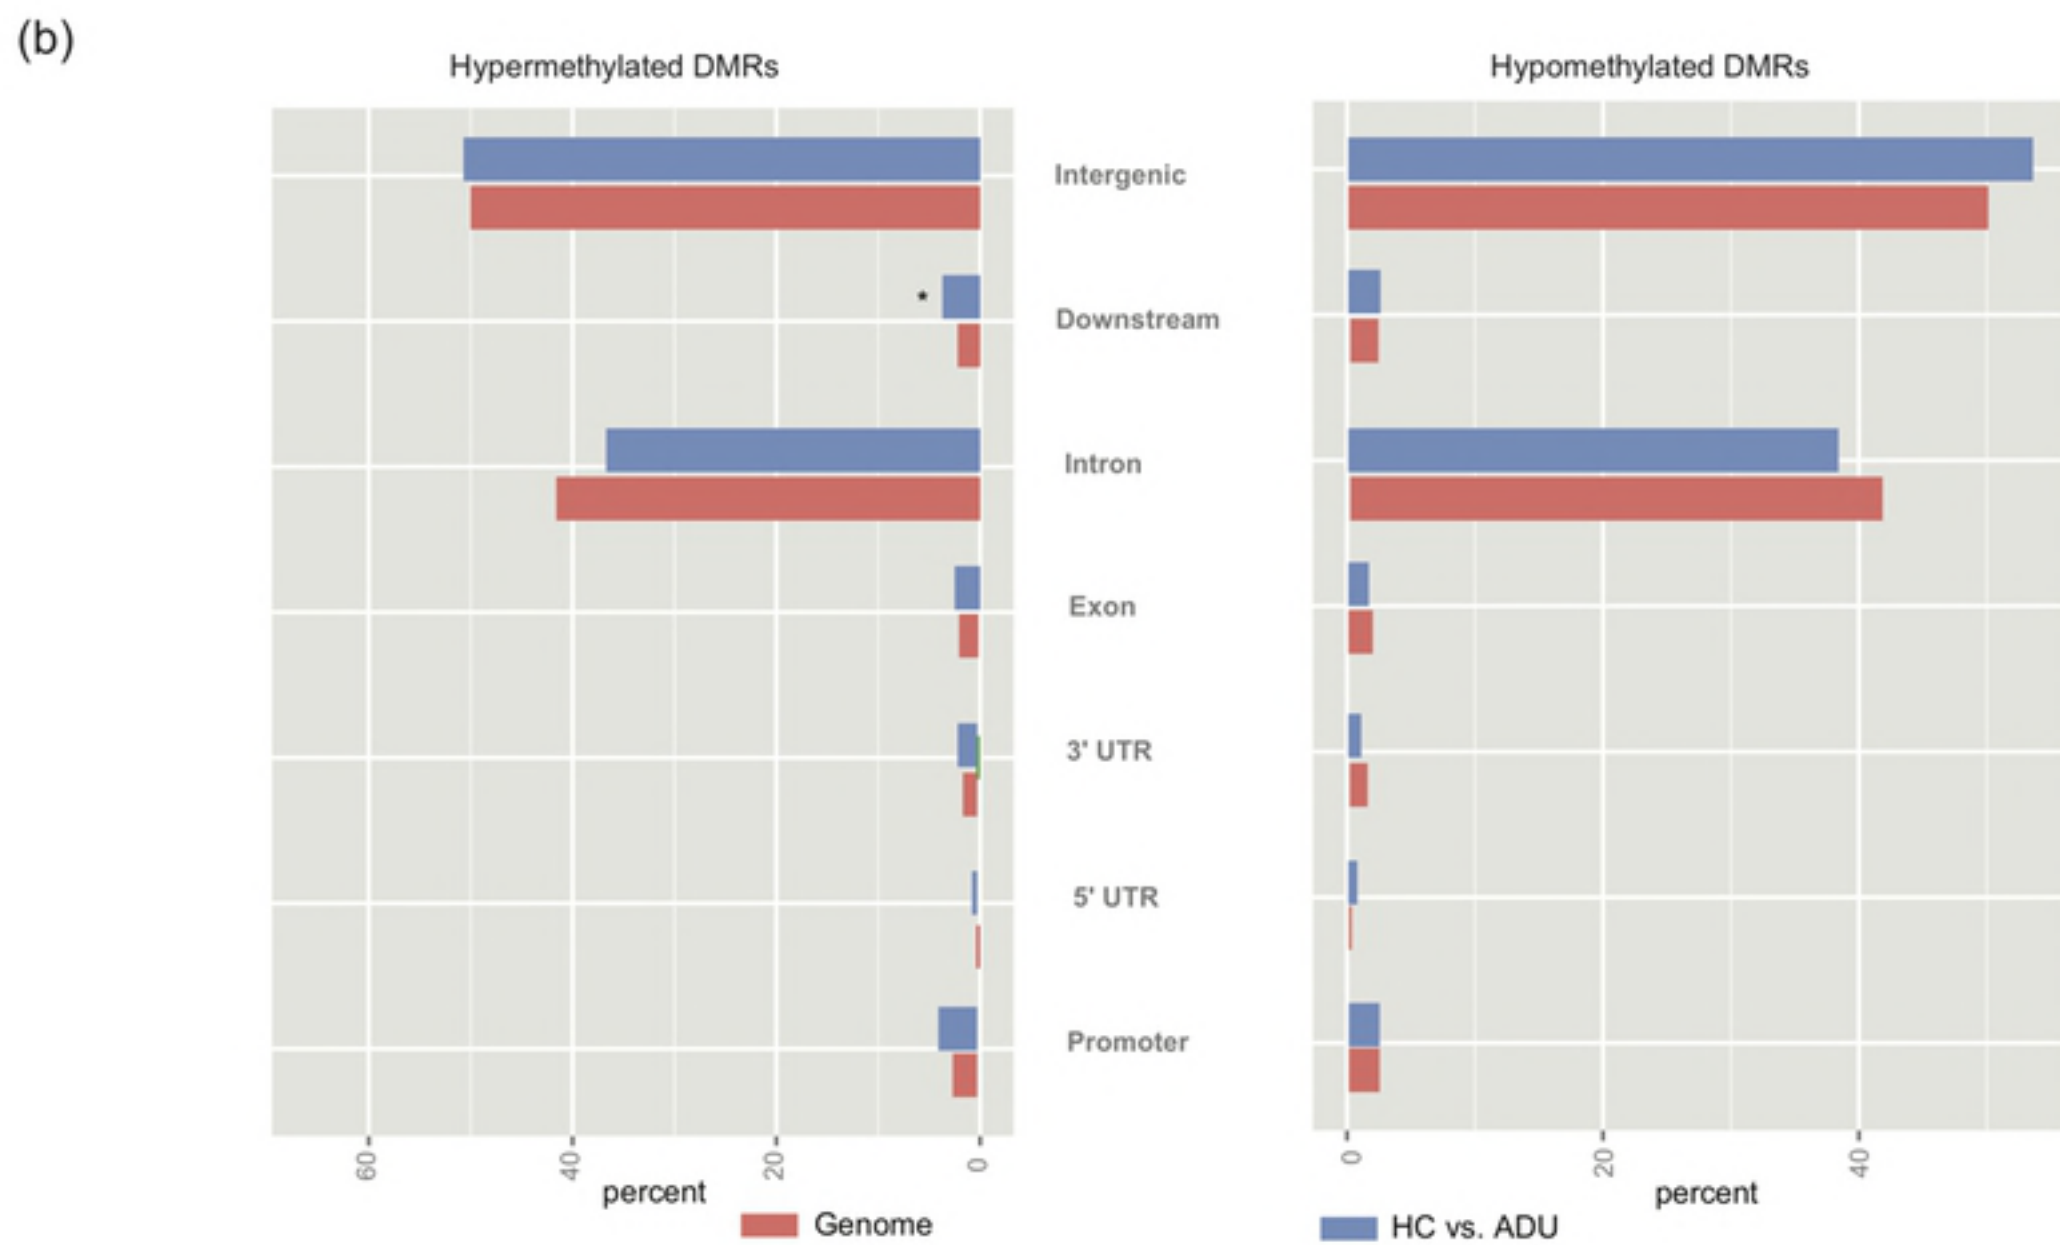



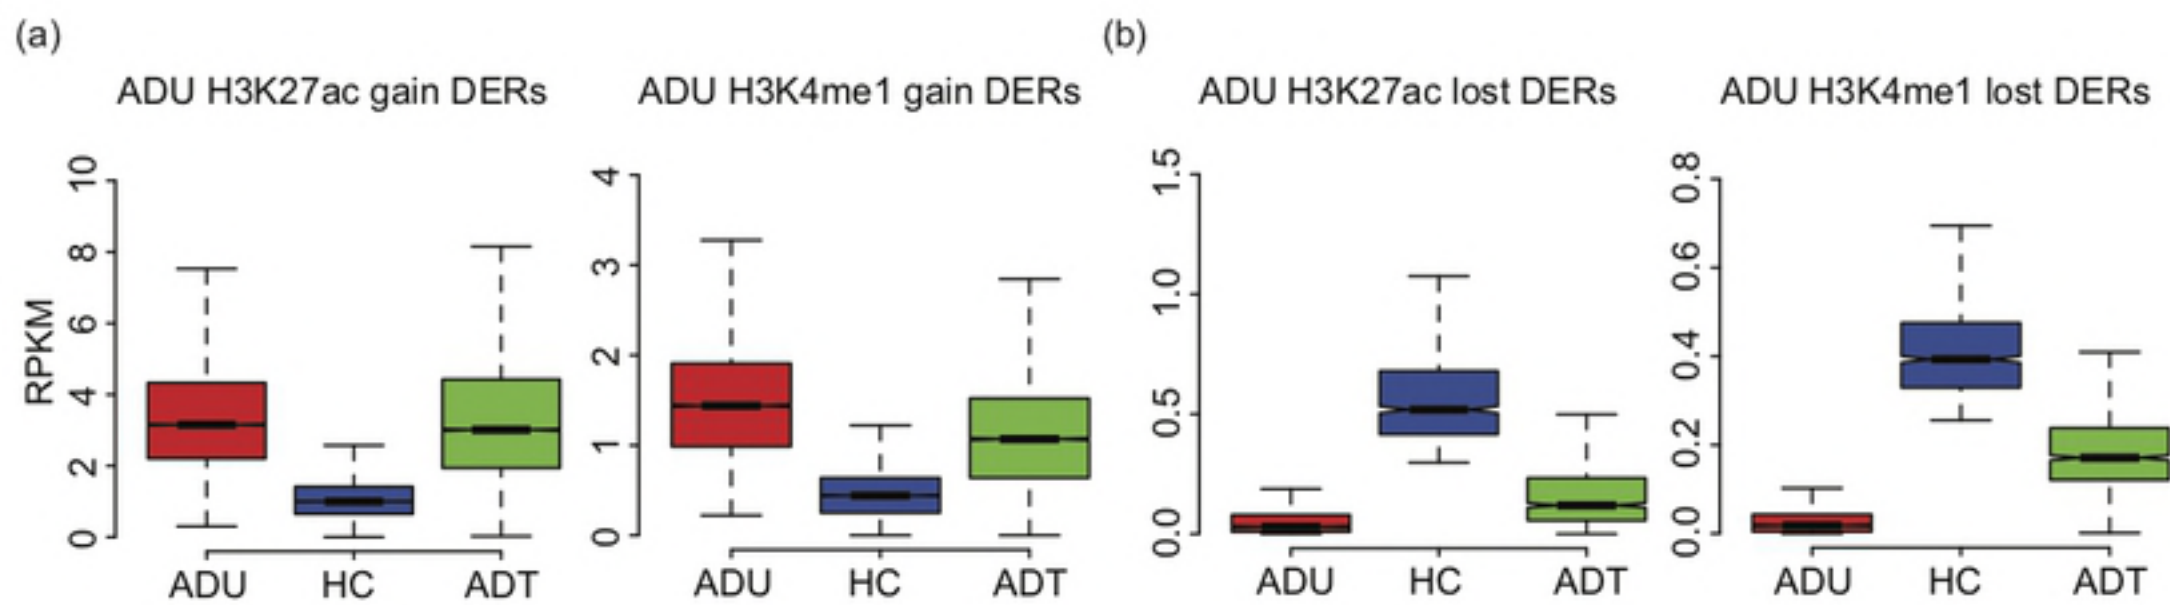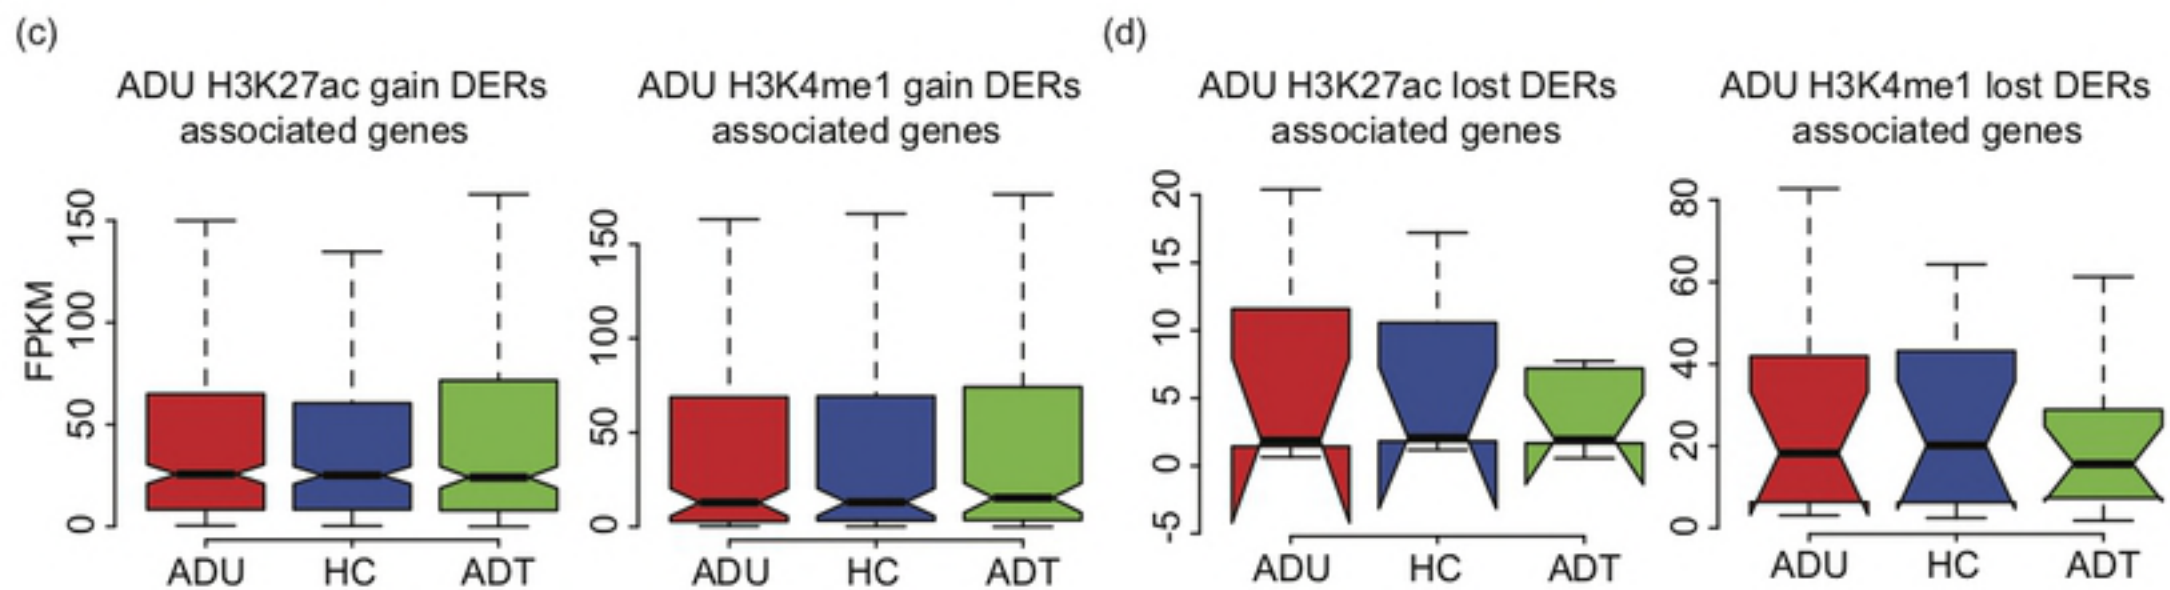

Source: http://biorxiv.org/content/10.1101/349811v1.full.pdf
